# Supplementary material for: Alteration of Gene Expression Signatures of Cortical Differentiation and Wound Response in Lethal Clear Cell Renal Cell Carcinomas
Source: PLoS One. 2009 Jun 25;4(6):e6039. doi: 10.1371/journal.pone.0006039 (PMC2698218; doi:10.1371/journal.pone.0006039)
Supplement: File S1 — Comparison of SPC genes with normal kidney gene sets (0.37 MB XLS) [file pone.0006039.s001.xls]

## Sheet: Glomerulus and SPC
Glomerulus genes			SPC genes			Overlapping genes
ID	NAME		ID	Name		ID	Name
IMAGE:1032509	unknown		IMAGE:1636365	TMEM27		IMAGE:131979	EPAS1
IMAGE:1128470	unknown		IMAGE:757374	FRMD3		IMAGE:1650998	PTPRB
IMAGE:115414	unknown		IMAGE:682063	ZNF189		IMAGE:214858	LDB2
IMAGE:1155148	NPHS1		IMAGE:1033767	unknown		IMAGE:258101	FLT1
IMAGE:117105	unknown		IMAGE:824769	SLA/LP		IMAGE:324122	ESM1
IMAGE:123117	unknown		IMAGE:2338271	NFIA		IMAGE:488404
IMAGE:130892	EHD3		IMAGE:841226	IVNS1ABP		IMAGE:489201	PPAP2B
IMAGE:131979	EPAS1		IMAGE:308004	NPR3		IMAGE:501994	IL1RL1
IMAGE:135010	SRGAP2P1		IMAGE:813154	NFIA		IMAGE:753301	CEACAM1
IMAGE:137230	GJA5		IMAGE:813265	NFIB		IMAGE:85394	PPAP2B
IMAGE:140951	unknown		IMAGE:45376	ACAA2
IMAGE:1456462	unknown		IMAGE:1553996	LRP2
IMAGE:1456818	unknown		IMAGE:347687	SGCB
IMAGE:1467799	MAGI2		IMAGE:489201	PPAP2B
IMAGE:1468655	EHD3		IMAGE:855658	FZD1
IMAGE:147744	CDKN1C		IMAGE:788234	ID4
IMAGE:148914	CLIC5		IMAGE:2514707	IVNS1ABP
IMAGE:1502008	unknown		IMAGE:450859	MAML2
IMAGE:151501	TEK		IMAGE:1762111	NPR3
IMAGE:1534752	unknown		IMAGE:1740567	unknown
IMAGE:1553305	unknown		IMAGE:269300	DDAH1
IMAGE:1555233	FAM131C		IMAGE:767804	ALDH3A2
IMAGE:1560480	ARHGAP28		IMAGE:81417	RNASE4
IMAGE:1603857	unknown		IMAGE:366763	LCHN
IMAGE:1604421	LMX1B		IMAGE:303139	FLJ14054
IMAGE:162722	unknown		IMAGE:261492	LCHN
IMAGE:1650998	PTPRB		IMAGE:505864	RGL1
IMAGE:1671646	unknown		IMAGE:1553346	HNMT
IMAGE:1686493	NFASC		IMAGE:812959	PWDMP
IMAGE:1700499	unknown		IMAGE:1554501	ADAMTS9
IMAGE:178463	ZEB1		IMAGE:293819	DHRS6
IMAGE:178825	NRGN		IMAGE:840776	SGK
IMAGE:1854985	PTPRB		IMAGE:324122	ESM1
IMAGE:1912985	unknown		IMAGE:325111	HAK
IMAGE:1947054	NTNG1		IMAGE:773293	unknown
IMAGE:1968136	HHEX		IMAGE:321900	unknown
IMAGE:2018581	IL6ST		IMAGE:257312	AD031
IMAGE:2028722	unknown		IMAGE:202577	HNMT
IMAGE:2028956	unknown		IMAGE:454698	FZD4
IMAGE:2106265	unknown		IMAGE:280907	ZNF248
IMAGE:212686	unknown		IMAGE:487301	FBXL5
IMAGE:214858	LDB2		IMAGE:742685	DAB2
IMAGE:2308409	SULF1		IMAGE:245860	NFIB
IMAGE:2314305	CDKN1C		IMAGE:321434	FZD2
IMAGE:248669	FLT4		IMAGE:427812	INSR
IMAGE:2500020	PTPRO		IMAGE:1604717	unknown
IMAGE:250654	unknown		IMAGE:415816	MYO9A
IMAGE:25154	unknown		IMAGE:130541	PECAM1
IMAGE:254276	EMCN		IMAGE:752668	unknown
IMAGE:258101	unknown		IMAGE:868078	NFIB
IMAGE:259896	unknown		IMAGE:234036	FBXL5
IMAGE:261241	NTNG1		IMAGE:2283651	TM4SF12
IMAGE:266135	NES		IMAGE:1517749	YPEL2
IMAGE:266336	CRHBP		IMAGE:301995	unknown
IMAGE:271737	ATP10A		IMAGE:342181	BCL2
IMAGE:272155	SRGAP2		IMAGE:85614	LEPROTL1
IMAGE:272630	EMCN		IMAGE:595181	MYLIP
IMAGE:273425	unknown		IMAGE:502164	KIAA0303
IMAGE:278137	unknown		IMAGE:785868	FLT1
IMAGE:283151	unknown		IMAGE:377518	DKFZp762A217
IMAGE:284865	EMCN		IMAGE:191107	unknown
IMAGE:285155	ODZ2		IMAGE:343760	SH3BGRL2
IMAGE:286661	unknown		IMAGE:300276	DHRS8
IMAGE:289645	APLP1		IMAGE:214858	LDB2
IMAGE:293403	CDC14A		IMAGE:49665	EDNRB
IMAGE:296140	FAM89A		IMAGE:376875	FMO1
IMAGE:298062	TNNT2		IMAGE:785351	ENPP2
IMAGE:320355	PLA2R1		IMAGE:2013515	SGK
IMAGE:323704	unknown		IMAGE:768619	PLEKHA2
IMAGE:324122	ESM1		IMAGE:279985	WDFY3
IMAGE:324593	MGC16291		IMAGE:704440	FLJ23861
IMAGE:343821	TYRO3		IMAGE:866674	unknown
IMAGE:343867	AIF1		IMAGE:296508	MYO9A
IMAGE:345663	RAMP3		IMAGE:823696	IFIT1
IMAGE:357209	unknown		IMAGE:416096	FLJ10847
IMAGE:359795	C4orf31		IMAGE:280831	DGKH
IMAGE:366887	unknown		IMAGE:745983	unknown
IMAGE:379604	RAMP2		IMAGE:81316	ARG99
IMAGE:38691	unknown		IMAGE:79022	FOSB
IMAGE:38931	unknown		IMAGE:812256	TMOD2
IMAGE:399421	unknown		IMAGE:754106	TIMP3
IMAGE:41447	APLNR		IMAGE:416325	unknown
IMAGE:415122	HS3ST3B1		IMAGE:1553540	C19orf28
IMAGE:415134	unknown		IMAGE:504791	GSTA4
IMAGE:435774	unknown		IMAGE:752903	KIAA0303
IMAGE:452345	CRHBP		IMAGE:969495	EPB41L4A
IMAGE:452384	unknown		IMAGE:797012	SUI1
IMAGE:455123	MTSS1		IMAGE:156404	LRP2
IMAGE:460435	unknown		IMAGE:810090	unknown
IMAGE:462412	unknown		IMAGE:1505692	RGS5
IMAGE:487327	TPPP3		IMAGE:209758	MME
IMAGE:487424	SYNE1		IMAGE:46411	FARP1
IMAGE:487878	unknown		IMAGE:510729	PTPN21
IMAGE:488404	unknown		IMAGE:853809	RGS5
IMAGE:489201	PPAP2B		IMAGE:53092	SLC3A1
IMAGE:490647	PCOLCE2		IMAGE:1324438	UGT2B7
IMAGE:501994	IL1RL1		IMAGE:1492652	FLJ23861
IMAGE:502706	IL1RL1		IMAGE:815245	TTC10
IMAGE:503617	CXCL9		IMAGE:245147	FGD5
IMAGE:505000	ALS2CL		IMAGE:44477	VCAM1
IMAGE:51041	PTPRB		IMAGE:781468	DKFZP434F0318
IMAGE:529302	unknown		IMAGE:868472	CLIC4
IMAGE:562729	S100A8		IMAGE:194342	PTD012
IMAGE:609440	unknown		IMAGE:283430	HACE1
IMAGE:67221	FLT1		IMAGE:246430	UGT2B4
IMAGE:68049	IGFBP5		IMAGE:813187	DDAH1
IMAGE:701231	CRHBP		IMAGE:323806	unknown
IMAGE:703707	unknown		IMAGE:33182	unknown
IMAGE:704026	ZDHHC6		IMAGE:2550047	IFIT1
IMAGE:712570	SRGAP2P1		IMAGE:756370	EHBP1
IMAGE:712829	LMO2		IMAGE:701710	TCF4
IMAGE:724052	SMAD6		IMAGE:1324446	EVA1
IMAGE:726678	SPOCK2		IMAGE:418049	CLCN5
IMAGE:726743	NFASC		IMAGE:108422	SH3YL1
IMAGE:753301	CEACAM1		IMAGE:143661	NTN4
IMAGE:754358	SPOCK1		IMAGE:838240	C1orf39
IMAGE:757428	unknown		IMAGE:149745	unknown
IMAGE:772220	PDIA5		IMAGE:416959	NFIB
IMAGE:795579	unknown		IMAGE:197959	SGCB
IMAGE:796152	FRMD6		IMAGE:50926	SH3BGRL2
IMAGE:796303	SRGAP2P1		IMAGE:49164	VCAM1
IMAGE:80830	unknown		IMAGE:377468	SPRY1
IMAGE:809784	KLK6		IMAGE:364209	ANK3
IMAGE:809824	PMEPA1		IMAGE:897557	HNRPH3
IMAGE:810521	unknown		IMAGE:1635600	CHC1L
IMAGE:810727	CLIC5		IMAGE:124597	unknown
IMAGE:813841	PLAT		IMAGE:271050	EDNRB
IMAGE:825343	unknown		IMAGE:1688510	CLK4
IMAGE:85394	PPAP2B		IMAGE:544502	IFIT1
IMAGE:854763	NOSTRIN		IMAGE:753692	ABLIM1
IMAGE:858877	FCN3		IMAGE:589853	NAP1L2
IMAGE:897910	POSTN		IMAGE:1553550	LOC123876
			IMAGE:767823	PALMD
			IMAGE:488404	unknown
			IMAGE:51763	MAML2
			IMAGE:785389	CTPS
			IMAGE:2350947	unknown
			IMAGE:786672	RAPGEF5
			IMAGE:204735	unknown
			IMAGE:812291	SGCB
			IMAGE:666154	PDE8A
			IMAGE:45512	LOC283666
			IMAGE:1926246	LRCH1
			IMAGE:277414	MAF
			IMAGE:452708	FLJ21934
			IMAGE:365098	BNIP3L
			IMAGE:855389	TACC1
			IMAGE:144834	MAP7
			IMAGE:1650304	RICS
			IMAGE:594500	unknown
			IMAGE:2238788	GOLGIN-67
			IMAGE:742611	MXI1
			IMAGE:296587	HLF
			IMAGE:271038	RGS5
			IMAGE:281449	LOC51136
			IMAGE:122915	LOC286411
			IMAGE:258101	FLT1
			IMAGE:234011	PKP2
			IMAGE:1650998	PTPRB
			IMAGE:1680549	MXI1
			IMAGE:838048	unknown
			IMAGE:2316138	D2LIC
			IMAGE:243816	CD36
			IMAGE:504575	WDFY3
			IMAGE:796198	EFNB2
			IMAGE:504420	ARGBP2
			IMAGE:813721	KIAA0934
			IMAGE:364436	PITPNC1
			IMAGE:138672	unknown
			IMAGE:42558	GATM
			IMAGE:85394	PPAP2B
			IMAGE:232842	PELI1
			IMAGE:768523	MGC14276
			IMAGE:1882051	AFTIPHILIN
			IMAGE:595637	ARID5B
			IMAGE:843036	MAP7
			IMAGE:788445	CYP4V2
			IMAGE:845454	HOOK1
			IMAGE:563701	MRPL19
			IMAGE:2336208	ING3
			IMAGE:755881	AQP5
			IMAGE:840663	HSPC159
			IMAGE:812294	unknown
			IMAGE:1588859	PHTF1
			IMAGE:264537	C9orf55
			IMAGE:290378	PODXL
			IMAGE:1537001	MGAT4A
			IMAGE:1525823	SIAT8D
			IMAGE:40562	SGCB
			IMAGE:51920	OSBPL1A
			IMAGE:277073	MAP7
			IMAGE:267202	ZNF462
			IMAGE:302188	NEBL
			IMAGE:501994	IL1RL1
			IMAGE:1055460	PANK1
			IMAGE:124405	AIG1
			IMAGE:142259	OPTN
			IMAGE:795757	unknown
			IMAGE:364921	CTNND1
			IMAGE:412881	LOC55871
			IMAGE:1587715	unknown
			IMAGE:1638475	PER2
			IMAGE:774181	TIMP3
			IMAGE:1572838	KCNIP4
			IMAGE:78294	unknown
			IMAGE:435824	INM01
			IMAGE:1908402	TAZ
			IMAGE:1474023	JAG1
			IMAGE:687270	MEF2C
			IMAGE:29258	unknown
			IMAGE:758318	FBXO3
			IMAGE:416676	PELI1
			IMAGE:291965	WASPIP
			IMAGE:503741	LIFR
			IMAGE:430968	ENPP3
			IMAGE:898228	unknown
			IMAGE:461761	RNASE4
			IMAGE:471372	SLC35A3
			IMAGE:281706	BTBD7
			IMAGE:609366	MXI1
			IMAGE:298155	ACADM
			IMAGE:489102	EPIM
			IMAGE:810515	PTPRE
			IMAGE:309469	SSH2
			IMAGE:813157	DKFZp547A023
			IMAGE:757961	STX3A
			IMAGE:753301	CEACAM1
			IMAGE:869504	unknown
			IMAGE:785695	NDFIP2
			IMAGE:210599	unknown
			IMAGE:824150	PSMB7
			IMAGE:841620	DPYSL2
			IMAGE:366209	unknown
			IMAGE:447786	AUTS2
			IMAGE:823901	UVRAG
			IMAGE:609525	ETV6
			IMAGE:450938	DKFZP586A0522
			IMAGE:284076	CREBL2
			IMAGE:853358	unknown
			IMAGE:796078	MAPKAP1
			IMAGE:565379	GRB10
			IMAGE:280122	KIAA1345
			IMAGE:66977	AIG1
			IMAGE:789369	ID4
			IMAGE:884903	VPS13A
			IMAGE:162308	CYYR1
			IMAGE:83358	unknown
			IMAGE:1591643	UGT2B7
			IMAGE:77325	DHX30
			IMAGE:502978	MOBKL2B
			IMAGE:291083	MOBKL2B
			IMAGE:24033	unknown
			IMAGE:345645	PDGFB
			IMAGE:66978	unknown
			IMAGE:1492276	RNASE4
			IMAGE:310105	IFIT5
			IMAGE:1638993	NRF1
			IMAGE:298134	FZD1
			IMAGE:384088	KIAA0711
			IMAGE:897963	KIAA0052
			IMAGE:32110	ABCG2
			IMAGE:897271	KL
			IMAGE:701629	TCF4
			IMAGE:342720	SNRK
			IMAGE:841220	unknown
			IMAGE:435160	PSMA7
			IMAGE:843374	STOM
			IMAGE:82290	C9orf42
			IMAGE:2516036	ABLIM1
			IMAGE:141815	JAG1
			IMAGE:284022	unknown
			IMAGE:1915749	GMFG
			IMAGE:196189	CYB5
			IMAGE:23794	RAB11FIP3
			IMAGE:1925760	PTEN
			IMAGE:123755	ERG
			IMAGE:137457	NFATC3
			IMAGE:627509	CDKN1B
			IMAGE:2010684	unknown
			IMAGE:269663	unknown
			IMAGE:812161	PARD6G
			IMAGE:741790	AFTIPHILIN
			IMAGE:2569701	RGS5
			IMAGE:878182	A2M
			IMAGE:501540	ARID5B
			IMAGE:135640	STX3A
			IMAGE:1114524	LOC146517
			IMAGE:209756	SAP18
			IMAGE:46355	LOC57146
			IMAGE:289016	MAGI1
			IMAGE:1688537	FBXO31
			IMAGE:450998	unknown
			IMAGE:1758233	RGS4
			IMAGE:194399	GAB1
			IMAGE:46265	unknown
			IMAGE:1585904	FLJ11200
			IMAGE:489519	TIMP3
			IMAGE:1629535	DZIP3
			IMAGE:140064	LRCH1
			IMAGE:248545	GSTA2
			IMAGE:131979	EPAS1
			IMAGE:489947	MXI1
			IMAGE:796199	AHI1
			IMAGE:52021	DACH1
			IMAGE:62093	unknown
			IMAGE:530197	LOC134147
			IMAGE:289677	PFAAP5
			IMAGE:785986	unknown
			IMAGE:271478	MXI1
			IMAGE:1636606	UGT2B7
			IMAGE:435219	MXI1
			IMAGE:431208	MAML2
			IMAGE:1523140	NLGN1
			IMAGE:290555	CLK4
			IMAGE:199558	DHRS6
			IMAGE:782193	LATS2
			IMAGE:488945	unknown
			IMAGE:366966	PTEN
			IMAGE:812143	FLRT3
			IMAGE:1493181	HSPC129
			IMAGE:785535	PIAS1
			IMAGE:246543	unknown
			IMAGE:811890	SLK
			IMAGE:151240	unknown
			IMAGE:564898	NLGN1
			IMAGE:1031747	ALKBH
			IMAGE:841695	CG018
			IMAGE:741954	SLC25A23
			IMAGE:767721	FLJ32810
			IMAGE:1638455	unknown
			IMAGE:70152	DKFZP586A0522
			IMAGE:530185	CD83
			IMAGE:292068	SRP46
			IMAGE:713347	DKFZp434H2111
			IMAGE:139861	CREBL2
			IMAGE:1926217	PLEKHA1
			IMAGE:46070	unknown
			IMAGE:786544	HNRPDL
			IMAGE:814417	MLL5
			IMAGE:61502	PVRL3
			IMAGE:138104	PRRG4
			IMAGE:723955	EFNB2
			IMAGE:782812	IFNAR1
			IMAGE:346902	ZNF11B
			IMAGE:200599	unknown
			IMAGE:1759218	HBXIP
			IMAGE:1456717	PKP4
			IMAGE:1669563	RFP2
			IMAGE:322695	unknown
			IMAGE:448417	TNFRSF19
			IMAGE:731125	unknown
			IMAGE:768940	ANKRD12
			IMAGE:839094	CRYBA1
			IMAGE:858998	NDFIP2
			IMAGE:841610	EIF4EBP2
			IMAGE:280769	GSTA4
			IMAGE:841263	NUMB
			IMAGE:2549991	NME2
			IMAGE:77911	FLJ20366
			IMAGE:840970	KLEIP
			IMAGE:645956	C9orf87
			IMAGE:812137	FLJ20331
			IMAGE:253141	unknown
			IMAGE:504421	ADFP
			IMAGE:786612	unknown
			IMAGE:1620748	SLC30A7
			IMAGE:815303	DARS
			IMAGE:197404	unknown
			IMAGE:1500370	C10orf118
			IMAGE:812283	DIXDC1
			IMAGE:283982	unknown
			IMAGE:234425	LOC253981
			IMAGE:283995	UBE3A
			IMAGE:823902	TNFRSF21
			IMAGE:249517	unknown
			IMAGE:322461	ENPP5
			IMAGE:511633	DDX58
			IMAGE:814899	BNIP3L
			IMAGE:2312236	FAM8A1
			IMAGE:2578799	RPS2
			IMAGE:39798	SHMT1
			IMAGE:823943	unknown
			IMAGE:143332	NPY1R
			IMAGE:1555201	FCHO2
			IMAGE:242823	LOC146517
			IMAGE:1914520	unknown
			IMAGE:162211	ABCD3
			IMAGE:277621	FLJ23518
			IMAGE:221694	unknown
			IMAGE:395539	unknown
			IMAGE:278483	TYMS
			IMAGE:666371	THBS1
			IMAGE:1325813	unknown
			IMAGE:1569150	PFTK1
			IMAGE:82710	GSTA2
			IMAGE:843109	FARS1
			IMAGE:136984	unknown
			IMAGE:1500416	ATP11A
			IMAGE:1636851	unknown
			IMAGE:269269	TGFBR3
			IMAGE:713078	DGKQ
			IMAGE:826622	LKAP
			IMAGE:295323	unknown
			IMAGE:786530	C14orf154
			IMAGE:322443	SLC16A9
			IMAGE:193182	TACC1
			IMAGE:1635099	SLC5A12
			IMAGE:504300	FLT1
			IMAGE:428338	INADL
			IMAGE:1635920	SLC16A9
			IMAGE:32989	DKFZP564A022
			IMAGE:745437	MGC33302
			IMAGE:83649	unknown
			IMAGE:1472743	LGALS2
			IMAGE:148960	DKFZp761C169
			IMAGE:1690055	EPHA5
			IMAGE:594120	PDK4
			IMAGE:2556526	DSCR1
			IMAGE:742743	LOC253981
			IMAGE:139883	KIAA1754
			IMAGE:241874	FLJ12592
			IMAGE:40038	unknown
			IMAGE:841334	STIP1
			IMAGE:840442	DC36
			IMAGE:1160531	ERBB3
			IMAGE:417884	CYP4V2
			IMAGE:243291	unknown
			IMAGE:36387	ALDH9A1
			IMAGE:320857	KCNJ2
			IMAGE:812068	CYP4V2
			IMAGE:813266	FHL1
			IMAGE:282996	KIAA0240
			IMAGE:795552	HIBCH
			IMAGE:841332	ARHGDIB
			IMAGE:322128	RAB21
			IMAGE:810008	DZIP3
			IMAGE:322615	DKFZP564D172
			IMAGE:624379	RHOBTB1
			IMAGE:120106	CASP1
			IMAGE:31093	CDH13
			IMAGE:46715	unknown
			IMAGE:1902820	VPS13A
			IMAGE:712314	MYLIP
			IMAGE:788745	DCTN6
			IMAGE:79848	NEDD9
			IMAGE:853998	EVA1
			IMAGE:38569	CPNE8
			IMAGE:454701	CHD9
			IMAGE:183337	HLA-DMA
			IMAGE:1636072	JTB
			IMAGE:682045	STARD13
			IMAGE:324307	TM4SF10
			IMAGE:243741	UBD
			IMAGE:143426	RHOB
			IMAGE:256284	NRAS
			IMAGE:247240	C19orf13
			IMAGE:868652	C4A
			IMAGE:268700	unknown
			IMAGE:1582738	EAF2
			IMAGE:813631	TM7SF3
			IMAGE:198033	unknown
			IMAGE:196038	LOC129285
			IMAGE:773605	2009-09-11
			IMAGE:626326	SNRPN
			IMAGE:83180	IRF2BP2
			IMAGE:488033	DNAJB9
			IMAGE:229856	CEPT1
			IMAGE:785693	LOC128153
			IMAGE:2296063	KIAA0528
			IMAGE:80318	SP1
			IMAGE:342712	KIAA0494
			IMAGE:564549	BLMH
			IMAGE:210610	CEP1
			IMAGE:40537	ZNF510
			IMAGE:207808	NFATC3
			IMAGE:1632056	ZNF552
			IMAGE:141845	CRIM1
			IMAGE:39586	C19orf13
			IMAGE:295824	FLJ11848
			IMAGE:132165	C10orf32
			IMAGE:813678	SLC1A3
			IMAGE:759159	RGS5
			IMAGE:869187	EPAS1
			IMAGE:503033	BTBD7
			IMAGE:328810	PPM1E
			IMAGE:141562	SLC16A4
			IMAGE:1940425	FLJ32810
			IMAGE:1521459	LOC126661
			IMAGE:47900	IFNGR1
			IMAGE:453602	CALD1
			IMAGE:727551	IRF2
			IMAGE:1592953	JAK1
			IMAGE:2139152	RAPGEF2
			1240243	C1orf25
			IMAGE:785530	PELO
			IMAGE:1571882	unknown
			IMAGE:136954	FLJ90013
			IMAGE:292939	ZBTB4
			IMAGE:328768	HS2ST1
			IMAGE:744944	MYO6

## Sheet: Papillary and SPC
Pappilary genes			SPC genes			Overlapping genes
ID	NAME		ID	Name
IMAGE:111377	RP6-213H19.1		IMAGE:1636365	TMEM27		none
IMAGE:119982	AGR3		IMAGE:757374	FRMD3
IMAGE:1410444	AREG		IMAGE:682063	ZNF189
IMAGE:141315	TFPI2		IMAGE:1033767	unknown
IMAGE:141726	unknown		IMAGE:824769	SLA/LP
IMAGE:147050	PTGS2		IMAGE:2338271	NFIA
IMAGE:1474987	EHF		IMAGE:841226	IVNS1ABP
IMAGE:1505038	RBM35A		IMAGE:308004	NPR3
IMAGE:150897	unknown		IMAGE:813154	NFIA
IMAGE:1552136	unknown		IMAGE:813265	NFIB
IMAGE:1555924	SCARA3		IMAGE:45376	ACAA2
IMAGE:1556638	unknown		IMAGE:1553996	LRP2
IMAGE:1569449	unknown		IMAGE:347687	SGCB
IMAGE:1619375	unknown		IMAGE:489201	PPAP2B
IMAGE:1621513	VGLL3		IMAGE:855658	FZD1
IMAGE:162479	ELF3		IMAGE:788234	ID4
IMAGE:1637801	unknown		IMAGE:2514707	IVNS1ABP
IMAGE:1657336	NPAL1		IMAGE:450859	MAML2
IMAGE:1665349	GREM1		IMAGE:1762111	NPR3
IMAGE:1703455	LPAR1		IMAGE:1740567	unknown
IMAGE:1703518	unknown		IMAGE:269300	DDAH1
IMAGE:1732922	KRT80		IMAGE:767804	ALDH3A2
IMAGE:179283	SH3GL3		IMAGE:81417	RNASE4
IMAGE:1877697	LOC130576		IMAGE:366763	LCHN
IMAGE:188388	ITGA10		IMAGE:303139	FLJ14054
IMAGE:1964012	unknown		IMAGE:261492	LCHN
IMAGE:196992	AKR1C1		IMAGE:505864	RGL1
IMAGE:199648	unknown		IMAGE:1553346	HNMT
IMAGE:204483	ATAD2		IMAGE:812959	PWDMP
IMAGE:207274	IGF2		IMAGE:1554501	ADAMTS9
IMAGE:2095066	ADH1C		IMAGE:293819	DHRS6
IMAGE:212620	unknown		IMAGE:840776	SGK
IMAGE:213136	BTG2		IMAGE:324122	ESM1
IMAGE:220372	HS3ST1		IMAGE:325111	HAK
IMAGE:240062	SLC14A1		IMAGE:773293	unknown
IMAGE:243700	unknown		IMAGE:321900	unknown
IMAGE:2449395	AKR1C2		IMAGE:257312	AD031
IMAGE:245330	IGF2		IMAGE:202577	HNMT
IMAGE:2477598	SLPI		IMAGE:454698	FZD4
IMAGE:2511265	LAMB3		IMAGE:280907	ZNF248
IMAGE:2511663	MPHOSPH10		IMAGE:487301	FBXL5
IMAGE:2511682	GCNT3		IMAGE:742685	DAB2
IMAGE:25159	CNNM1		IMAGE:245860	NFIB
IMAGE:2516260	LTBP1		IMAGE:321434	FZD2
IMAGE:2562178	ELF3		IMAGE:427812	INSR
IMAGE:2568350	KRT19		IMAGE:1604717	unknown
IMAGE:258118	unknown		IMAGE:415816	MYO9A
IMAGE:258649	unknown		IMAGE:130541	PECAM1
IMAGE:262061	MGC11082		IMAGE:752668	unknown
IMAGE:272507	ME1		IMAGE:868078	NFIB
IMAGE:277042	STXBP6		IMAGE:234036	FBXL5
IMAGE:278644	LIX1		IMAGE:2283651	TM4SF12
IMAGE:280989	SLC14A1		IMAGE:1517749	YPEL2
IMAGE:284541	unknown		IMAGE:301995	unknown
IMAGE:289706	SLCO1A2		IMAGE:342181	BCL2
IMAGE:293736	unknown		IMAGE:85614	LEPROTL1
IMAGE:296448	IGF2		IMAGE:595181	MYLIP
IMAGE:307231	ADH1B		IMAGE:502164	KIAA0303
IMAGE:309583	RARRES1		IMAGE:785868	FLT1
IMAGE:324690	GREM1		IMAGE:377518	DKFZp762A217
IMAGE:324951	GREM1		IMAGE:191107	unknown
IMAGE:345081	unknown		IMAGE:343760	SH3BGRL2
IMAGE:366902	SLPI		IMAGE:300276	DHRS8
IMAGE:366950	SLPI		IMAGE:214858	LDB2
IMAGE:376296	TACSTD2		IMAGE:49665	EDNRB
IMAGE:415110	unknown		IMAGE:376875	FMO1
IMAGE:428721	H19		IMAGE:785351	ENPP2
IMAGE:447520	UCA1		IMAGE:2013515	SGK
IMAGE:453589	SLC2A1		IMAGE:768619	PLEKHA2
IMAGE:460666	VGLL1		IMAGE:279985	WDFY3
IMAGE:461468	unknown		IMAGE:704440	FLJ23861
IMAGE:491311	unknown		IMAGE:866674	unknown
IMAGE:506516	SCARA3		IMAGE:296508	MYO9A
IMAGE:509459	unknown		IMAGE:823696	IFIT1
IMAGE:510466	KRT19		IMAGE:416096	FLJ10847
IMAGE:591265	KRT17		IMAGE:280831	DGKH
IMAGE:664975	CLDN1		IMAGE:745983	unknown
IMAGE:66532	EDN3		IMAGE:81316	ARG99
IMAGE:67769	KCNK3		IMAGE:79022	FOSB
IMAGE:725680	unknown		IMAGE:812256	TMOD2
IMAGE:725877	unknown		IMAGE:754106	TIMP3
IMAGE:726086	TFPI2		IMAGE:416325	unknown
IMAGE:73609	HS3ST1		IMAGE:1553540	C19orf28
IMAGE:741497	LCN2		IMAGE:504791	GSTA4
IMAGE:745525	DPT		IMAGE:752903	KIAA0303
IMAGE:767181	MOXD1		IMAGE:969495	EPB41L4A
IMAGE:768064	CYP1A1		IMAGE:797012	SUI1
IMAGE:769600	CCNO		IMAGE:156404	LRP2
IMAGE:770388	CLDN4		IMAGE:810090	unknown
IMAGE:770910	ELF3		IMAGE:1505692	RGS5
IMAGE:772425	FAP		IMAGE:209758	MME
IMAGE:773573	PCDH7		IMAGE:46411	FARP1
IMAGE:810131	KRT19		IMAGE:510729	PTPN21
IMAGE:811028	TMEM49		IMAGE:853809	RGS5
IMAGE:814798	unknown		IMAGE:53092	SLC3A1
IMAGE:841059	CAPG		IMAGE:1324438	UGT2B7
IMAGE:841282	SFRP4		IMAGE:1492652	FLJ23861
IMAGE:841621	AGR3		IMAGE:815245	TTC10
IMAGE:951108	unknown		IMAGE:245147	FGD5
IMAGE:967930	CLDN4		IMAGE:44477	VCAM1
			IMAGE:781468	DKFZP434F0318
			IMAGE:868472	CLIC4
			IMAGE:194342	PTD012
			IMAGE:283430	HACE1
			IMAGE:246430	UGT2B4
			IMAGE:813187	DDAH1
			IMAGE:323806	unknown
			IMAGE:33182	unknown
			IMAGE:2550047	IFIT1
			IMAGE:756370	EHBP1
			IMAGE:701710	TCF4
			IMAGE:1324446	EVA1
			IMAGE:418049	CLCN5
			IMAGE:108422	SH3YL1
			IMAGE:143661	NTN4
			IMAGE:838240	C1orf39
			IMAGE:149745	unknown
			IMAGE:416959	NFIB
			IMAGE:197959	SGCB
			IMAGE:50926	SH3BGRL2
			IMAGE:49164	VCAM1
			IMAGE:377468	SPRY1
			IMAGE:364209	ANK3
			IMAGE:897557	HNRPH3
			IMAGE:1635600	CHC1L
			IMAGE:124597	unknown
			IMAGE:271050	EDNRB
			IMAGE:1688510	CLK4
			IMAGE:544502	IFIT1
			IMAGE:753692	ABLIM1
			IMAGE:589853	NAP1L2
			IMAGE:1553550	LOC123876
			IMAGE:767823	PALMD
			IMAGE:488404	unknown
			IMAGE:51763	MAML2
			IMAGE:785389	CTPS
			IMAGE:2350947	unknown
			IMAGE:786672	RAPGEF5
			IMAGE:204735	unknown
			IMAGE:812291	SGCB
			IMAGE:666154	PDE8A
			IMAGE:45512	LOC283666
			IMAGE:1926246	LRCH1
			IMAGE:277414	MAF
			IMAGE:452708	FLJ21934
			IMAGE:365098	BNIP3L
			IMAGE:855389	TACC1
			IMAGE:144834	MAP7
			IMAGE:1650304	RICS
			IMAGE:594500	unknown
			IMAGE:2238788	GOLGIN-67
			IMAGE:742611	MXI1
			IMAGE:296587	HLF
			IMAGE:271038	RGS5
			IMAGE:281449	LOC51136
			IMAGE:122915	LOC286411
			IMAGE:258101	FLT1
			IMAGE:234011	PKP2
			IMAGE:1650998	PTPRB
			IMAGE:1680549	MXI1
			IMAGE:838048	unknown
			IMAGE:2316138	D2LIC
			IMAGE:243816	CD36
			IMAGE:504575	WDFY3
			IMAGE:796198	EFNB2
			IMAGE:504420	ARGBP2
			IMAGE:813721	KIAA0934
			IMAGE:364436	PITPNC1
			IMAGE:138672	unknown
			IMAGE:42558	GATM
			IMAGE:85394	PPAP2B
			IMAGE:232842	PELI1
			IMAGE:768523	MGC14276
			IMAGE:1882051	AFTIPHILIN
			IMAGE:595637	ARID5B
			IMAGE:843036	MAP7
			IMAGE:788445	CYP4V2
			IMAGE:845454	HOOK1
			IMAGE:563701	MRPL19
			IMAGE:2336208	ING3
			IMAGE:755881	AQP5
			IMAGE:840663	HSPC159
			IMAGE:812294	unknown
			IMAGE:1588859	PHTF1
			IMAGE:264537	C9orf55
			IMAGE:290378	PODXL
			IMAGE:1537001	MGAT4A
			IMAGE:1525823	SIAT8D
			IMAGE:40562	SGCB
			IMAGE:51920	OSBPL1A
			IMAGE:277073	MAP7
			IMAGE:267202	ZNF462
			IMAGE:302188	NEBL
			IMAGE:501994	IL1RL1
			IMAGE:1055460	PANK1
			IMAGE:124405	AIG1
			IMAGE:142259	OPTN
			IMAGE:795757	unknown
			IMAGE:364921	CTNND1
			IMAGE:412881	LOC55871
			IMAGE:1587715	unknown
			IMAGE:1638475	PER2
			IMAGE:774181	TIMP3
			IMAGE:1572838	KCNIP4
			IMAGE:78294	unknown
			IMAGE:435824	INM01
			IMAGE:1908402	TAZ
			IMAGE:1474023	JAG1
			IMAGE:687270	MEF2C
			IMAGE:29258	unknown
			IMAGE:758318	FBXO3
			IMAGE:416676	PELI1
			IMAGE:291965	WASPIP
			IMAGE:503741	LIFR
			IMAGE:430968	ENPP3
			IMAGE:898228	unknown
			IMAGE:461761	RNASE4
			IMAGE:471372	SLC35A3
			IMAGE:281706	BTBD7
			IMAGE:609366	MXI1
			IMAGE:298155	ACADM
			IMAGE:489102	EPIM
			IMAGE:810515	PTPRE
			IMAGE:309469	SSH2
			IMAGE:813157	DKFZp547A023
			IMAGE:757961	STX3A
			IMAGE:753301	CEACAM1
			IMAGE:869504	unknown
			IMAGE:785695	NDFIP2
			IMAGE:210599	unknown
			IMAGE:824150	PSMB7
			IMAGE:841620	DPYSL2
			IMAGE:366209	unknown
			IMAGE:447786	AUTS2
			IMAGE:823901	UVRAG
			IMAGE:609525	ETV6
			IMAGE:450938	DKFZP586A0522
			IMAGE:284076	CREBL2
			IMAGE:853358	unknown
			IMAGE:796078	MAPKAP1
			IMAGE:565379	GRB10
			IMAGE:280122	KIAA1345
			IMAGE:66977	AIG1
			IMAGE:789369	ID4
			IMAGE:884903	VPS13A
			IMAGE:162308	CYYR1
			IMAGE:83358	unknown
			IMAGE:1591643	UGT2B7
			IMAGE:77325	DHX30
			IMAGE:502978	MOBKL2B
			IMAGE:291083	MOBKL2B
			IMAGE:24033	unknown
			IMAGE:345645	PDGFB
			IMAGE:66978	unknown
			IMAGE:1492276	RNASE4
			IMAGE:310105	IFIT5
			IMAGE:1638993	NRF1
			IMAGE:298134	FZD1
			IMAGE:384088	KIAA0711
			IMAGE:897963	KIAA0052
			IMAGE:32110	ABCG2
			IMAGE:897271	KL
			IMAGE:701629	TCF4
			IMAGE:342720	SNRK
			IMAGE:841220	unknown
			IMAGE:435160	PSMA7
			IMAGE:843374	STOM
			IMAGE:82290	C9orf42
			IMAGE:2516036	ABLIM1
			IMAGE:141815	JAG1
			IMAGE:284022	unknown
			IMAGE:1915749	GMFG
			IMAGE:196189	CYB5
			IMAGE:23794	RAB11FIP3
			IMAGE:1925760	PTEN
			IMAGE:123755	ERG
			IMAGE:137457	NFATC3
			IMAGE:627509	CDKN1B
			IMAGE:2010684	unknown
			IMAGE:269663	unknown
			IMAGE:812161	PARD6G
			IMAGE:741790	AFTIPHILIN
			IMAGE:2569701	RGS5
			IMAGE:878182	A2M
			IMAGE:501540	ARID5B
			IMAGE:135640	STX3A
			IMAGE:1114524	LOC146517
			IMAGE:209756	SAP18
			IMAGE:46355	LOC57146
			IMAGE:289016	MAGI1
			IMAGE:1688537	FBXO31
			IMAGE:450998	unknown
			IMAGE:1758233	RGS4
			IMAGE:194399	GAB1
			IMAGE:46265	unknown
			IMAGE:1585904	FLJ11200
			IMAGE:489519	TIMP3
			IMAGE:1629535	DZIP3
			IMAGE:140064	LRCH1
			IMAGE:248545	GSTA2
			IMAGE:131979	EPAS1
			IMAGE:489947	MXI1
			IMAGE:796199	AHI1
			IMAGE:52021	DACH1
			IMAGE:62093	unknown
			IMAGE:530197	LOC134147
			IMAGE:289677	PFAAP5
			IMAGE:785986	unknown
			IMAGE:271478	MXI1
			IMAGE:1636606	UGT2B7
			IMAGE:435219	MXI1
			IMAGE:431208	MAML2
			IMAGE:1523140	NLGN1
			IMAGE:290555	CLK4
			IMAGE:199558	DHRS6
			IMAGE:782193	LATS2
			IMAGE:488945	unknown
			IMAGE:366966	PTEN
			IMAGE:812143	FLRT3
			IMAGE:1493181	HSPC129
			IMAGE:785535	PIAS1
			IMAGE:246543	unknown
			IMAGE:811890	SLK
			IMAGE:151240	unknown
			IMAGE:564898	NLGN1
			IMAGE:1031747	ALKBH
			IMAGE:841695	CG018
			IMAGE:741954	SLC25A23
			IMAGE:767721	FLJ32810
			IMAGE:1638455	unknown
			IMAGE:70152	DKFZP586A0522
			IMAGE:530185	CD83
			IMAGE:292068	SRP46
			IMAGE:713347	DKFZp434H2111
			IMAGE:139861	CREBL2
			IMAGE:1926217	PLEKHA1
			IMAGE:46070	unknown
			IMAGE:786544	HNRPDL
			IMAGE:814417	MLL5
			IMAGE:61502	PVRL3
			IMAGE:138104	PRRG4
			IMAGE:723955	EFNB2
			IMAGE:782812	IFNAR1
			IMAGE:346902	ZNF11B
			IMAGE:200599	unknown
			IMAGE:1759218	HBXIP
			IMAGE:1456717	PKP4
			IMAGE:1669563	RFP2
			IMAGE:322695	unknown
			IMAGE:448417	TNFRSF19
			IMAGE:731125	unknown
			IMAGE:768940	ANKRD12
			IMAGE:839094	CRYBA1
			IMAGE:858998	NDFIP2
			IMAGE:841610	EIF4EBP2
			IMAGE:280769	GSTA4
			IMAGE:841263	NUMB
			IMAGE:2549991	NME2
			IMAGE:77911	FLJ20366
			IMAGE:840970	KLEIP
			IMAGE:645956	C9orf87
			IMAGE:812137	FLJ20331
			IMAGE:253141	unknown
			IMAGE:504421	ADFP
			IMAGE:786612	unknown
			IMAGE:1620748	SLC30A7
			IMAGE:815303	DARS
			IMAGE:197404	unknown
			IMAGE:1500370	C10orf118
			IMAGE:812283	DIXDC1
			IMAGE:283982	unknown
			IMAGE:234425	LOC253981
			IMAGE:283995	UBE3A
			IMAGE:823902	TNFRSF21
			IMAGE:249517	unknown
			IMAGE:322461	ENPP5
			IMAGE:511633	DDX58
			IMAGE:814899	BNIP3L
			IMAGE:2312236	FAM8A1
			IMAGE:2578799	RPS2
			IMAGE:39798	SHMT1
			IMAGE:823943	unknown
			IMAGE:143332	NPY1R
			IMAGE:1555201	FCHO2
			IMAGE:242823	LOC146517
			IMAGE:1914520	unknown
			IMAGE:162211	ABCD3
			IMAGE:277621	FLJ23518
			IMAGE:221694	unknown
			IMAGE:395539	unknown
			IMAGE:278483	TYMS
			IMAGE:666371	THBS1
			IMAGE:1325813	unknown
			IMAGE:1569150	PFTK1
			IMAGE:82710	GSTA2
			IMAGE:843109	FARS1
			IMAGE:136984	unknown
			IMAGE:1500416	ATP11A
			IMAGE:1636851	unknown
			IMAGE:269269	TGFBR3
			IMAGE:713078	DGKQ
			IMAGE:826622	LKAP
			IMAGE:295323	unknown
			IMAGE:786530	C14orf154
			IMAGE:322443	SLC16A9
			IMAGE:193182	TACC1
			IMAGE:1635099	SLC5A12
			IMAGE:504300	FLT1
			IMAGE:428338	INADL
			IMAGE:1635920	SLC16A9
			IMAGE:32989	DKFZP564A022
			IMAGE:745437	MGC33302
			IMAGE:83649	unknown
			IMAGE:1472743	LGALS2
			IMAGE:148960	DKFZp761C169
			IMAGE:1690055	EPHA5
			IMAGE:594120	PDK4
			IMAGE:2556526	DSCR1
			IMAGE:742743	LOC253981
			IMAGE:139883	KIAA1754
			IMAGE:241874	FLJ12592
			IMAGE:40038	unknown
			IMAGE:841334	STIP1
			IMAGE:840442	DC36
			IMAGE:1160531	ERBB3
			IMAGE:417884	CYP4V2
			IMAGE:243291	unknown
			IMAGE:36387	ALDH9A1
			IMAGE:320857	KCNJ2
			IMAGE:812068	CYP4V2
			IMAGE:813266	FHL1
			IMAGE:282996	KIAA0240
			IMAGE:795552	HIBCH
			IMAGE:841332	ARHGDIB
			IMAGE:322128	RAB21
			IMAGE:810008	DZIP3
			IMAGE:322615	DKFZP564D172
			IMAGE:624379	RHOBTB1
			IMAGE:120106	CASP1
			IMAGE:31093	CDH13
			IMAGE:46715	unknown
			IMAGE:1902820	VPS13A
			IMAGE:712314	MYLIP
			IMAGE:788745	DCTN6
			IMAGE:79848	NEDD9
			IMAGE:853998	EVA1
			IMAGE:38569	CPNE8
			IMAGE:454701	CHD9
			IMAGE:183337	HLA-DMA
			IMAGE:1636072	JTB
			IMAGE:682045	STARD13
			IMAGE:324307	TM4SF10
			IMAGE:243741	UBD
			IMAGE:143426	RHOB
			IMAGE:256284	NRAS
			IMAGE:247240	C19orf13
			IMAGE:868652	C4A
			IMAGE:268700	unknown
			IMAGE:1582738	EAF2
			IMAGE:813631	TM7SF3
			IMAGE:198033	unknown
			IMAGE:196038	LOC129285
			IMAGE:773605	2009-09-11
			IMAGE:626326	SNRPN
			IMAGE:83180	IRF2BP2
			IMAGE:488033	DNAJB9
			IMAGE:229856	CEPT1
			IMAGE:785693	LOC128153
			IMAGE:2296063	KIAA0528
			IMAGE:80318	SP1
			IMAGE:342712	KIAA0494
			IMAGE:564549	BLMH
			IMAGE:210610	CEP1
			IMAGE:40537	ZNF510
			IMAGE:207808	NFATC3
			IMAGE:1632056	ZNF552
			IMAGE:141845	CRIM1
			IMAGE:39586	C19orf13
			IMAGE:295824	FLJ11848
			IMAGE:132165	C10orf32
			IMAGE:813678	SLC1A3
			IMAGE:759159	RGS5
			IMAGE:869187	EPAS1
			IMAGE:503033	BTBD7
			IMAGE:328810	PPM1E
			IMAGE:141562	SLC16A4
			IMAGE:1940425	FLJ32810
			IMAGE:1521459	LOC126661
			IMAGE:47900	IFNGR1
			IMAGE:453602	CALD1
			IMAGE:727551	IRF2
			IMAGE:1592953	JAK1
			IMAGE:2139152	RAPGEF2
			1240243	C1orf25
			IMAGE:785530	PELO
			IMAGE:1571882	unknown
			IMAGE:136954	FLJ90013
			IMAGE:292939	ZBTB4
			IMAGE:328768	HS2ST1
			IMAGE:744944	MYO6

## Sheet: medulla and SPC
Medulla genes			SPC genes			Overlapping genes
ID	NAME		ID	Name
IMAGE:1031919	RDH10		IMAGE:1636365	TMEM27		none
IMAGE:1257131	LOC440995		IMAGE:757374	FRMD3
IMAGE:142755	SYT7		IMAGE:682063	ZNF189
IMAGE:154172	FCGBP		IMAGE:1033767	unknown
IMAGE:1554477	unknown		IMAGE:824769	SLA/LP
IMAGE:1555287	TFCP2L1		IMAGE:2338271	NFIA
IMAGE:1559868	unknown		IMAGE:841226	IVNS1ABP
IMAGE:1585510	MFI2		IMAGE:308004	NPR3
IMAGE:1607229	unknown		IMAGE:813154	NFIA
IMAGE:1635219	FXYD4		IMAGE:813265	NFIB
IMAGE:1636341	EGO		IMAGE:45376	ACAA2
IMAGE:1636986	unknown		IMAGE:1553996	LRP2
IMAGE:1637080	FXYD4		IMAGE:347687	SGCB
IMAGE:1637238	AQP2		IMAGE:489201	PPAP2B
IMAGE:1713869	unknown		IMAGE:855658	FZD1
IMAGE:178922	C9orf58		IMAGE:788234	ID4
IMAGE:1868423	C1orf168		IMAGE:2514707	IVNS1ABP
IMAGE:1895672	LCN12		IMAGE:450859	MAML2
IMAGE:1902764	unknown		IMAGE:1762111	NPR3
IMAGE:2013496	unknown		IMAGE:1740567	unknown
IMAGE:205445	H1F0		IMAGE:269300	DDAH1
IMAGE:2161300	CA8		IMAGE:767804	ALDH3A2
IMAGE:2305693	L1CAM		IMAGE:81417	RNASE4
IMAGE:234444	unknown		IMAGE:366763	LCHN
IMAGE:234469	C1orf168		IMAGE:303139	FLJ14054
IMAGE:23566	LGI2		IMAGE:261492	LCHN
IMAGE:240133	PROX1		IMAGE:505864	RGL1
IMAGE:243905	unknown		IMAGE:1553346	HNMT
IMAGE:2446879	CAPN6		IMAGE:812959	PWDMP
IMAGE:2472002	H1F0		IMAGE:1554501	ADAMTS9
IMAGE:248481	unknown		IMAGE:293819	DHRS6
IMAGE:2504257	unknown		IMAGE:840776	SGK
IMAGE:2543921	unknown		IMAGE:324122	ESM1
IMAGE:257730	unknown		IMAGE:325111	HAK
IMAGE:269787	L1CAM		IMAGE:773293	unknown
IMAGE:278375	unknown		IMAGE:321900	unknown
IMAGE:287528	SLC38A11		IMAGE:257312	AD031
IMAGE:294578	SERPINA1		IMAGE:202577	HNMT
IMAGE:343744	H1F0		IMAGE:454698	FZD4
IMAGE:345743	unknown		IMAGE:280907	ZNF248
IMAGE:357396	MUC15		IMAGE:487301	FBXL5
IMAGE:363003	SLCO4A1		IMAGE:742685	DAB2
IMAGE:38740	CA8		IMAGE:245860	NFIB
IMAGE:39147	LOC654433		IMAGE:321434	FZD2
IMAGE:435948	AKR1B1		IMAGE:427812	INSR
IMAGE:448782	C20orf175		IMAGE:1604717	unknown
IMAGE:460039	C1orf168		IMAGE:415816	MYO9A
IMAGE:460781	unknown		IMAGE:130541	PECAM1
IMAGE:470393	MMP7		IMAGE:752668	unknown
IMAGE:487302	HSPB7		IMAGE:868078	NFIB
IMAGE:489560	MRPS6		IMAGE:234036	FBXL5
IMAGE:49203	DDIT4L		IMAGE:2283651	TM4SF12
IMAGE:503064	unknown		IMAGE:1517749	YPEL2
IMAGE:53384	GABRA2		IMAGE:301995	unknown
IMAGE:591994	EPS8L2		IMAGE:342181	BCL2
IMAGE:626348	TMEM139		IMAGE:85614	LEPROTL1
IMAGE:665356	TNFRSF11B		IMAGE:595181	MYLIP
IMAGE:740975	SLC4A11		IMAGE:502164	KIAA0303
IMAGE:744360	MRPS6		IMAGE:785868	FLT1
IMAGE:785819	MRPS6		IMAGE:377518	DKFZp762A217
IMAGE:795835	unknown		IMAGE:191107	unknown
IMAGE:809838	unknown		IMAGE:343760	SH3BGRL2
IMAGE:839882	unknown		IMAGE:300276	DHRS8
IMAGE:840687	MUC1		IMAGE:214858	LDB2
IMAGE:858315	HOXB9		IMAGE:49665	EDNRB
IMAGE:898051	TNC		IMAGE:376875	FMO1
IMAGE:926259	SLCO4A1		IMAGE:785351	ENPP2
IMAGE:970697	unknown		IMAGE:2013515	SGK
			IMAGE:768619	PLEKHA2
			IMAGE:279985	WDFY3
			IMAGE:704440	FLJ23861
			IMAGE:866674	unknown
			IMAGE:296508	MYO9A
			IMAGE:823696	IFIT1
			IMAGE:416096	FLJ10847
			IMAGE:280831	DGKH
			IMAGE:745983	unknown
			IMAGE:81316	ARG99
			IMAGE:79022	FOSB
			IMAGE:812256	TMOD2
			IMAGE:754106	TIMP3
			IMAGE:416325	unknown
			IMAGE:1553540	C19orf28
			IMAGE:504791	GSTA4
			IMAGE:752903	KIAA0303
			IMAGE:969495	EPB41L4A
			IMAGE:797012	SUI1
			IMAGE:156404	LRP2
			IMAGE:810090	unknown
			IMAGE:1505692	RGS5
			IMAGE:209758	MME
			IMAGE:46411	FARP1
			IMAGE:510729	PTPN21
			IMAGE:853809	RGS5
			IMAGE:53092	SLC3A1
			IMAGE:1324438	UGT2B7
			IMAGE:1492652	FLJ23861
			IMAGE:815245	TTC10
			IMAGE:245147	FGD5
			IMAGE:44477	VCAM1
			IMAGE:781468	DKFZP434F0318
			IMAGE:868472	CLIC4
			IMAGE:194342	PTD012
			IMAGE:283430	HACE1
			IMAGE:246430	UGT2B4
			IMAGE:813187	DDAH1
			IMAGE:323806	unknown
			IMAGE:33182	unknown
			IMAGE:2550047	IFIT1
			IMAGE:756370	EHBP1
			IMAGE:701710	TCF4
			IMAGE:1324446	EVA1
			IMAGE:418049	CLCN5
			IMAGE:108422	SH3YL1
			IMAGE:143661	NTN4
			IMAGE:838240	C1orf39
			IMAGE:149745	unknown
			IMAGE:416959	NFIB
			IMAGE:197959	SGCB
			IMAGE:50926	SH3BGRL2
			IMAGE:49164	VCAM1
			IMAGE:377468	SPRY1
			IMAGE:364209	ANK3
			IMAGE:897557	HNRPH3
			IMAGE:1635600	CHC1L
			IMAGE:124597	unknown
			IMAGE:271050	EDNRB
			IMAGE:1688510	CLK4
			IMAGE:544502	IFIT1
			IMAGE:753692	ABLIM1
			IMAGE:589853	NAP1L2
			IMAGE:1553550	LOC123876
			IMAGE:767823	PALMD
			IMAGE:488404	unknown
			IMAGE:51763	MAML2
			IMAGE:785389	CTPS
			IMAGE:2350947	unknown
			IMAGE:786672	RAPGEF5
			IMAGE:204735	unknown
			IMAGE:812291	SGCB
			IMAGE:666154	PDE8A
			IMAGE:45512	LOC283666
			IMAGE:1926246	LRCH1
			IMAGE:277414	MAF
			IMAGE:452708	FLJ21934
			IMAGE:365098	BNIP3L
			IMAGE:855389	TACC1
			IMAGE:144834	MAP7
			IMAGE:1650304	RICS
			IMAGE:594500	unknown
			IMAGE:2238788	GOLGIN-67
			IMAGE:742611	MXI1
			IMAGE:296587	HLF
			IMAGE:271038	RGS5
			IMAGE:281449	LOC51136
			IMAGE:122915	LOC286411
			IMAGE:258101	FLT1
			IMAGE:234011	PKP2
			IMAGE:1650998	PTPRB
			IMAGE:1680549	MXI1
			IMAGE:838048	unknown
			IMAGE:2316138	D2LIC
			IMAGE:243816	CD36
			IMAGE:504575	WDFY3
			IMAGE:796198	EFNB2
			IMAGE:504420	ARGBP2
			IMAGE:813721	KIAA0934
			IMAGE:364436	PITPNC1
			IMAGE:138672	unknown
			IMAGE:42558	GATM
			IMAGE:85394	PPAP2B
			IMAGE:232842	PELI1
			IMAGE:768523	MGC14276
			IMAGE:1882051	AFTIPHILIN
			IMAGE:595637	ARID5B
			IMAGE:843036	MAP7
			IMAGE:788445	CYP4V2
			IMAGE:845454	HOOK1
			IMAGE:563701	MRPL19
			IMAGE:2336208	ING3
			IMAGE:755881	AQP5
			IMAGE:840663	HSPC159
			IMAGE:812294	unknown
			IMAGE:1588859	PHTF1
			IMAGE:264537	C9orf55
			IMAGE:290378	PODXL
			IMAGE:1537001	MGAT4A
			IMAGE:1525823	SIAT8D
			IMAGE:40562	SGCB
			IMAGE:51920	OSBPL1A
			IMAGE:277073	MAP7
			IMAGE:267202	ZNF462
			IMAGE:302188	NEBL
			IMAGE:501994	IL1RL1
			IMAGE:1055460	PANK1
			IMAGE:124405	AIG1
			IMAGE:142259	OPTN
			IMAGE:795757	unknown
			IMAGE:364921	CTNND1
			IMAGE:412881	LOC55871
			IMAGE:1587715	unknown
			IMAGE:1638475	PER2
			IMAGE:774181	TIMP3
			IMAGE:1572838	KCNIP4
			IMAGE:78294	unknown
			IMAGE:435824	INM01
			IMAGE:1908402	TAZ
			IMAGE:1474023	JAG1
			IMAGE:687270	MEF2C
			IMAGE:29258	unknown
			IMAGE:758318	FBXO3
			IMAGE:416676	PELI1
			IMAGE:291965	WASPIP
			IMAGE:503741	LIFR
			IMAGE:430968	ENPP3
			IMAGE:898228	unknown
			IMAGE:461761	RNASE4
			IMAGE:471372	SLC35A3
			IMAGE:281706	BTBD7
			IMAGE:609366	MXI1
			IMAGE:298155	ACADM
			IMAGE:489102	EPIM
			IMAGE:810515	PTPRE
			IMAGE:309469	SSH2
			IMAGE:813157	DKFZp547A023
			IMAGE:757961	STX3A
			IMAGE:753301	CEACAM1
			IMAGE:869504	unknown
			IMAGE:785695	NDFIP2
			IMAGE:210599	unknown
			IMAGE:824150	PSMB7
			IMAGE:841620	DPYSL2
			IMAGE:366209	unknown
			IMAGE:447786	AUTS2
			IMAGE:823901	UVRAG
			IMAGE:609525	ETV6
			IMAGE:450938	DKFZP586A0522
			IMAGE:284076	CREBL2
			IMAGE:853358	unknown
			IMAGE:796078	MAPKAP1
			IMAGE:565379	GRB10
			IMAGE:280122	KIAA1345
			IMAGE:66977	AIG1
			IMAGE:789369	ID4
			IMAGE:884903	VPS13A
			IMAGE:162308	CYYR1
			IMAGE:83358	unknown
			IMAGE:1591643	UGT2B7
			IMAGE:77325	DHX30
			IMAGE:502978	MOBKL2B
			IMAGE:291083	MOBKL2B
			IMAGE:24033	unknown
			IMAGE:345645	PDGFB
			IMAGE:66978	unknown
			IMAGE:1492276	RNASE4
			IMAGE:310105	IFIT5
			IMAGE:1638993	NRF1
			IMAGE:298134	FZD1
			IMAGE:384088	KIAA0711
			IMAGE:897963	KIAA0052
			IMAGE:32110	ABCG2
			IMAGE:897271	KL
			IMAGE:701629	TCF4
			IMAGE:342720	SNRK
			IMAGE:841220	unknown
			IMAGE:435160	PSMA7
			IMAGE:843374	STOM
			IMAGE:82290	C9orf42
			IMAGE:2516036	ABLIM1
			IMAGE:141815	JAG1
			IMAGE:284022	unknown
			IMAGE:1915749	GMFG
			IMAGE:196189	CYB5
			IMAGE:23794	RAB11FIP3
			IMAGE:1925760	PTEN
			IMAGE:123755	ERG
			IMAGE:137457	NFATC3
			IMAGE:627509	CDKN1B
			IMAGE:2010684	unknown
			IMAGE:269663	unknown
			IMAGE:812161	PARD6G
			IMAGE:741790	AFTIPHILIN
			IMAGE:2569701	RGS5
			IMAGE:878182	A2M
			IMAGE:501540	ARID5B
			IMAGE:135640	STX3A
			IMAGE:1114524	LOC146517
			IMAGE:209756	SAP18
			IMAGE:46355	LOC57146
			IMAGE:289016	MAGI1
			IMAGE:1688537	FBXO31
			IMAGE:450998	unknown
			IMAGE:1758233	RGS4
			IMAGE:194399	GAB1
			IMAGE:46265	unknown
			IMAGE:1585904	FLJ11200
			IMAGE:489519	TIMP3
			IMAGE:1629535	DZIP3
			IMAGE:140064	LRCH1
			IMAGE:248545	GSTA2
			IMAGE:131979	EPAS1
			IMAGE:489947	MXI1
			IMAGE:796199	AHI1
			IMAGE:52021	DACH1
			IMAGE:62093	unknown
			IMAGE:530197	LOC134147
			IMAGE:289677	PFAAP5
			IMAGE:785986	unknown
			IMAGE:271478	MXI1
			IMAGE:1636606	UGT2B7
			IMAGE:435219	MXI1
			IMAGE:431208	MAML2
			IMAGE:1523140	NLGN1
			IMAGE:290555	CLK4
			IMAGE:199558	DHRS6
			IMAGE:782193	LATS2
			IMAGE:488945	unknown
			IMAGE:366966	PTEN
			IMAGE:812143	FLRT3
			IMAGE:1493181	HSPC129
			IMAGE:785535	PIAS1
			IMAGE:246543	unknown
			IMAGE:811890	SLK
			IMAGE:151240	unknown
			IMAGE:564898	NLGN1
			IMAGE:1031747	ALKBH
			IMAGE:841695	CG018
			IMAGE:741954	SLC25A23
			IMAGE:767721	FLJ32810
			IMAGE:1638455	unknown
			IMAGE:70152	DKFZP586A0522
			IMAGE:530185	CD83
			IMAGE:292068	SRP46
			IMAGE:713347	DKFZp434H2111
			IMAGE:139861	CREBL2
			IMAGE:1926217	PLEKHA1
			IMAGE:46070	unknown
			IMAGE:786544	HNRPDL
			IMAGE:814417	MLL5
			IMAGE:61502	PVRL3
			IMAGE:138104	PRRG4
			IMAGE:723955	EFNB2
			IMAGE:782812	IFNAR1
			IMAGE:346902	ZNF11B
			IMAGE:200599	unknown
			IMAGE:1759218	HBXIP
			IMAGE:1456717	PKP4
			IMAGE:1669563	RFP2
			IMAGE:322695	unknown
			IMAGE:448417	TNFRSF19
			IMAGE:731125	unknown
			IMAGE:768940	ANKRD12
			IMAGE:839094	CRYBA1
			IMAGE:858998	NDFIP2
			IMAGE:841610	EIF4EBP2
			IMAGE:280769	GSTA4
			IMAGE:841263	NUMB
			IMAGE:2549991	NME2
			IMAGE:77911	FLJ20366
			IMAGE:840970	KLEIP
			IMAGE:645956	C9orf87
			IMAGE:812137	FLJ20331
			IMAGE:253141	unknown
			IMAGE:504421	ADFP
			IMAGE:786612	unknown
			IMAGE:1620748	SLC30A7
			IMAGE:815303	DARS
			IMAGE:197404	unknown
			IMAGE:1500370	C10orf118
			IMAGE:812283	DIXDC1
			IMAGE:283982	unknown
			IMAGE:234425	LOC253981
			IMAGE:283995	UBE3A
			IMAGE:823902	TNFRSF21
			IMAGE:249517	unknown
			IMAGE:322461	ENPP5
			IMAGE:511633	DDX58
			IMAGE:814899	BNIP3L
			IMAGE:2312236	FAM8A1
			IMAGE:2578799	RPS2
			IMAGE:39798	SHMT1
			IMAGE:823943	unknown
			IMAGE:143332	NPY1R
			IMAGE:1555201	FCHO2
			IMAGE:242823	LOC146517
			IMAGE:1914520	unknown
			IMAGE:162211	ABCD3
			IMAGE:277621	FLJ23518
			IMAGE:221694	unknown
			IMAGE:395539	unknown
			IMAGE:278483	TYMS
			IMAGE:666371	THBS1
			IMAGE:1325813	unknown
			IMAGE:1569150	PFTK1
			IMAGE:82710	GSTA2
			IMAGE:843109	FARS1
			IMAGE:136984	unknown
			IMAGE:1500416	ATP11A
			IMAGE:1636851	unknown
			IMAGE:269269	TGFBR3
			IMAGE:713078	DGKQ
			IMAGE:826622	LKAP
			IMAGE:295323	unknown
			IMAGE:786530	C14orf154
			IMAGE:322443	SLC16A9
			IMAGE:193182	TACC1
			IMAGE:1635099	SLC5A12
			IMAGE:504300	FLT1
			IMAGE:428338	INADL
			IMAGE:1635920	SLC16A9
			IMAGE:32989	DKFZP564A022
			IMAGE:745437	MGC33302
			IMAGE:83649	unknown
			IMAGE:1472743	LGALS2
			IMAGE:148960	DKFZp761C169
			IMAGE:1690055	EPHA5
			IMAGE:594120	PDK4
			IMAGE:2556526	DSCR1
			IMAGE:742743	LOC253981
			IMAGE:139883	KIAA1754
			IMAGE:241874	FLJ12592
			IMAGE:40038	unknown
			IMAGE:841334	STIP1
			IMAGE:840442	DC36
			IMAGE:1160531	ERBB3
			IMAGE:417884	CYP4V2
			IMAGE:243291	unknown
			IMAGE:36387	ALDH9A1
			IMAGE:320857	KCNJ2
			IMAGE:812068	CYP4V2
			IMAGE:813266	FHL1
			IMAGE:282996	KIAA0240
			IMAGE:795552	HIBCH
			IMAGE:841332	ARHGDIB
			IMAGE:322128	RAB21
			IMAGE:810008	DZIP3
			IMAGE:322615	DKFZP564D172
			IMAGE:624379	RHOBTB1
			IMAGE:120106	CASP1
			IMAGE:31093	CDH13
			IMAGE:46715	unknown
			IMAGE:1902820	VPS13A
			IMAGE:712314	MYLIP
			IMAGE:788745	DCTN6
			IMAGE:79848	NEDD9
			IMAGE:853998	EVA1
			IMAGE:38569	CPNE8
			IMAGE:454701	CHD9
			IMAGE:183337	HLA-DMA
			IMAGE:1636072	JTB
			IMAGE:682045	STARD13
			IMAGE:324307	TM4SF10
			IMAGE:243741	UBD
			IMAGE:143426	RHOB
			IMAGE:256284	NRAS
			IMAGE:247240	C19orf13
			IMAGE:868652	C4A
			IMAGE:268700	unknown
			IMAGE:1582738	EAF2
			IMAGE:813631	TM7SF3
			IMAGE:198033	unknown
			IMAGE:196038	LOC129285
			IMAGE:773605	2009-09-11
			IMAGE:626326	SNRPN
			IMAGE:83180	IRF2BP2
			IMAGE:488033	DNAJB9
			IMAGE:229856	CEPT1
			IMAGE:785693	LOC128153
			IMAGE:2296063	KIAA0528
			IMAGE:80318	SP1
			IMAGE:342712	KIAA0494
			IMAGE:564549	BLMH
			IMAGE:210610	CEP1
			IMAGE:40537	ZNF510
			IMAGE:207808	NFATC3
			IMAGE:1632056	ZNF552
			IMAGE:141845	CRIM1
			IMAGE:39586	C19orf13
			IMAGE:295824	FLJ11848
			IMAGE:132165	C10orf32
			IMAGE:813678	SLC1A3
			IMAGE:759159	RGS5
			IMAGE:869187	EPAS1
			IMAGE:503033	BTBD7
			IMAGE:328810	PPM1E
			IMAGE:141562	SLC16A4
			IMAGE:1940425	FLJ32810
			IMAGE:1521459	LOC126661
			IMAGE:47900	IFNGR1
			IMAGE:453602	CALD1
			IMAGE:727551	IRF2
			IMAGE:1592953	JAK1
			IMAGE:2139152	RAPGEF2
			1240243	C1orf25
			IMAGE:785530	PELO
			IMAGE:1571882	unknown
			IMAGE:136954	FLJ90013
			IMAGE:292939	ZBTB4
			IMAGE:328768	HS2ST1
			IMAGE:744944	MYO6

## Sheet: pelvis and SPC
Pelvis genes			SPC genes			Overlapping genes
ID	NAME		ID	Name		ID	Name
1048993	LOC100132639		IMAGE:1636365	TMEM27		IMAGE:243816	CD36
1292020	RGS22		IMAGE:757374	FRMD3		IMAGE:813266	FHL1
IMAGE:1030271	BCAS1		IMAGE:682063	ZNF189
IMAGE:1030498	MMP2		IMAGE:1033767	unknown
IMAGE:1031552	EPHB6		IMAGE:824769	SLA/LP
IMAGE:1034494	ADAM19		IMAGE:2338271	NFIA
IMAGE:1048696	APOBEC3G		IMAGE:841226	IVNS1ABP
IMAGE:1057492	unknown		IMAGE:308004	NPR3
IMAGE:108864	CREB3L1		IMAGE:813154	NFIA
IMAGE:1129559	FBLN1		IMAGE:813265	NFIB
IMAGE:1132490	SCUBE2		IMAGE:45376	ACAA2
IMAGE:1144652	GPA33		IMAGE:1553996	LRP2
IMAGE:1161564	DMN		IMAGE:347687	SGCB
IMAGE:117806	IGJ		IMAGE:489201	PPAP2B
IMAGE:118429	SWAP70		IMAGE:855658	FZD1
IMAGE:118494	unknown		IMAGE:788234	ID4
IMAGE:118865	unknown		IMAGE:2514707	IVNS1ABP
IMAGE:1191115	SLITRK6		IMAGE:450859	MAML2
IMAGE:119290	VSIG2		IMAGE:1762111	NPR3
IMAGE:119851	KLRK1		IMAGE:1740567	unknown
IMAGE:120707	unknown		IMAGE:269300	DDAH1
IMAGE:122321	VCAN		IMAGE:767804	ALDH3A2
IMAGE:126341	MYLK		IMAGE:81417	RNASE4
IMAGE:127648	CD36		IMAGE:366763	LCHN
IMAGE:129024	FGL1		IMAGE:303139	FLJ14054
IMAGE:1325420	IGHG1		IMAGE:261492	LCHN
IMAGE:132711	KLF5		IMAGE:505864	RGL1
IMAGE:133647	unknown		IMAGE:1553346	HNMT
IMAGE:134422	unknown		IMAGE:812959	PWDMP
IMAGE:135221	S100P		IMAGE:1554501	ADAMTS9
IMAGE:135802	ADAM12		IMAGE:293819	DHRS6
IMAGE:137984	VGLL3		IMAGE:840776	SGK
IMAGE:138917	MYCL1		IMAGE:324122	ESM1
IMAGE:138991	COL6A3		IMAGE:325111	HAK
IMAGE:139660	unknown		IMAGE:773293	unknown
IMAGE:1412481	SPINK1		IMAGE:321900	unknown
IMAGE:1420842	MALT1		IMAGE:257312	AD031
IMAGE:143169	unknown		IMAGE:202577	HNMT
IMAGE:1435624	VCAN		IMAGE:454698	FZD4
IMAGE:1439157	MS4A8B		IMAGE:280907	ZNF248
IMAGE:144797	unknown		IMAGE:487301	FBXL5
IMAGE:1467195	CYP11B1		IMAGE:742685	DAB2
IMAGE:1472152	IGHG1		IMAGE:245860	NFIB
IMAGE:1473274	MYL9		IMAGE:321434	FZD2
IMAGE:1474174	MMP2		IMAGE:427812	INSR
IMAGE:1474900	KRT15		IMAGE:1604717	unknown
IMAGE:148469	TYROBP		IMAGE:415816	MYO9A
IMAGE:1500532	DCLK1		IMAGE:130541	PECAM1
IMAGE:1507245	KCNMA1		IMAGE:752668	unknown
IMAGE:151365	unknown		IMAGE:868078	NFIB
IMAGE:1517162	KLRK1		IMAGE:234036	FBXL5
IMAGE:153646	COL1A1		IMAGE:2283651	TM4SF12
IMAGE:1536968	CD3E		IMAGE:1517749	YPEL2
IMAGE:153883	KIAA1881		IMAGE:301995	unknown
IMAGE:154809	unknown		IMAGE:342181	BCL2
IMAGE:155227	unknown		IMAGE:85614	LEPROTL1
IMAGE:1554167	unknown		IMAGE:595181	MYLIP
IMAGE:155620	unknown		IMAGE:502164	KIAA0303
IMAGE:1558151	BATF		IMAGE:785868	FLT1
IMAGE:1558642	MLPH		IMAGE:377518	DKFZp762A217
IMAGE:1560599	unknown		IMAGE:191107	unknown
IMAGE:156437	ATP1A2		IMAGE:343760	SH3BGRL2
IMAGE:1565608	unknown		IMAGE:300276	DHRS8
IMAGE:1566793	EBI2		IMAGE:214858	LDB2
IMAGE:1569397	XYLT1		IMAGE:49665	EDNRB
IMAGE:1572196	SMOC2		IMAGE:376875	FMO1
IMAGE:1572298	CD247		IMAGE:785351	ENPP2
IMAGE:1572723	LOC389833		IMAGE:2013515	SGK
IMAGE:1580874	CORO2A		IMAGE:768619	PLEKHA2
IMAGE:1582717	unknown		IMAGE:279985	WDFY3
IMAGE:1584588	IGLV6-57		IMAGE:704440	FLJ23861
IMAGE:1584628	PDLIM3		IMAGE:866674	unknown
IMAGE:1589468	unknown		IMAGE:296508	MYO9A
IMAGE:1592021	CFH		IMAGE:823696	IFIT1
IMAGE:1601852	DTNA		IMAGE:416096	FLJ10847
IMAGE:1604735	unknown		IMAGE:280831	DGKH
IMAGE:160532	CYP4Z1		IMAGE:745983	unknown
IMAGE:1606557	FHL2		IMAGE:81316	ARG99
IMAGE:1609625	SELPLG		IMAGE:79022	FOSB
IMAGE:161456	SAA1		IMAGE:812256	TMOD2
IMAGE:161526	CYP4Z1		IMAGE:754106	TIMP3
IMAGE:1622129	SEMA3D		IMAGE:416325	unknown
IMAGE:162310	PMP22		IMAGE:1553540	C19orf28
IMAGE:1624261	unknown		IMAGE:504791	GSTA4
IMAGE:1629478	unknown		IMAGE:752903	KIAA0303
IMAGE:1632252	C1QA		IMAGE:969495	EPB41L4A
IMAGE:1635596	RASSF2		IMAGE:797012	SUI1
IMAGE:1636026	unknown		IMAGE:156404	LRP2
IMAGE:1636885	MS4A4A		IMAGE:810090	unknown
IMAGE:1637203	unknown		IMAGE:1505692	RGS5
IMAGE:1637282	HK2		IMAGE:209758	MME
IMAGE:1662182	CCDC80		IMAGE:46411	FARP1
IMAGE:166652	ST3GAL5		IMAGE:510729	PTPN21
IMAGE:1666549	KCNA3		IMAGE:853809	RGS5
IMAGE:1671522	unknown		IMAGE:53092	SLC3A1
IMAGE:1680246	SAA2		IMAGE:1324438	UGT2B7
IMAGE:1681579	unknown		IMAGE:1492652	FLJ23861
IMAGE:1691237	unknown		IMAGE:815245	TTC10
IMAGE:1698363	IGHG1		IMAGE:245147	FGD5
IMAGE:1711148	unknown		IMAGE:44477	VCAM1
IMAGE:1739569	unknown		IMAGE:781468	DKFZP434F0318
IMAGE:175123	MAPK7		IMAGE:868472	CLIC4
IMAGE:1751334	FBXO39		IMAGE:194342	PTD012
IMAGE:1759743	FER1L4		IMAGE:283430	HACE1
IMAGE:179890	ALOX5		IMAGE:246430	UGT2B4
IMAGE:183811	TNFSF10		IMAGE:813187	DDAH1
IMAGE:1855534	unknown		IMAGE:323806	unknown
IMAGE:1858230	GJB3		IMAGE:33182	unknown
IMAGE:1858928	unknown		IMAGE:2550047	IFIT1
IMAGE:1873017	CTSD		IMAGE:756370	EHBP1
IMAGE:187616	MYCL1		IMAGE:701710	TCF4
IMAGE:1877234	unknown		IMAGE:1324446	EVA1
IMAGE:1879640	IGSF10		IMAGE:418049	CLCN5
IMAGE:188036	unknown		IMAGE:108422	SH3YL1
IMAGE:1883559	FST		IMAGE:143661	NTN4
IMAGE:1895613	FN3K		IMAGE:838240	C1orf39
IMAGE:1895676	BARX1		IMAGE:149745	unknown
IMAGE:1915096	LILRB4		IMAGE:416959	NFIB
IMAGE:1925496	SHROOM1		IMAGE:197959	SGCB
IMAGE:1930639	unknown		IMAGE:50926	SH3BGRL2
IMAGE:1932984	FLRT2		IMAGE:49164	VCAM1
IMAGE:1933929	HAS3		IMAGE:377468	SPRY1
IMAGE:1964197	unknown		IMAGE:364209	ANK3
IMAGE:199663	unknown		IMAGE:897557	HNRPH3
IMAGE:2012523	FABP5L7		IMAGE:1635600	CHC1L
IMAGE:2045536	FXYD3		IMAGE:124597	unknown
IMAGE:208969	PVRL1		IMAGE:271050	EDNRB
IMAGE:2112621	RAB27B		IMAGE:1688510	CLK4
IMAGE:2119355	CRISP3		IMAGE:544502	IFIT1
IMAGE:2124107	UPK1A		IMAGE:753692	ABLIM1
IMAGE:213917	DOCK2		IMAGE:589853	NAP1L2
IMAGE:2143529	TRAT1		IMAGE:1553550	LOC123876
IMAGE:214441	IGHG1		IMAGE:767823	PALMD
IMAGE:215000	VIPR1		IMAGE:488404	unknown
IMAGE:2239290	CXCL12		IMAGE:51763	MAML2
IMAGE:2245295	IGLL1		IMAGE:785389	CTPS
IMAGE:2248368	SAA2		IMAGE:2350947	unknown
IMAGE:2256743	COL3A1		IMAGE:786672	RAPGEF5
IMAGE:2271170	LOC400451		IMAGE:204735	unknown
IMAGE:2308956	unknown		IMAGE:812291	SGCB
IMAGE:2312765	CFH		IMAGE:666154	PDE8A
IMAGE:2315876	TPSAB1		IMAGE:45512	LOC283666
IMAGE:2320870	unknown		IMAGE:1926246	LRCH1
IMAGE:2321104	FLNC		IMAGE:277414	MAF
IMAGE:2321113	AGR2		IMAGE:452708	FLJ21934
IMAGE:2342392	AOC3		IMAGE:365098	BNIP3L
IMAGE:2345206	CCR7		IMAGE:855389	TACC1
IMAGE:236124	IGL@		IMAGE:144834	MAP7
IMAGE:236333	ISLR		IMAGE:1650304	RICS
IMAGE:2385663	FGF13		IMAGE:594500	unknown
IMAGE:2391979	DHRS2		IMAGE:2238788	GOLGIN-67
IMAGE:24061	SEMA3A		IMAGE:742611	MXI1
IMAGE:240648	ASAH3L		IMAGE:296587	HLF
IMAGE:2409635	COL6A2		IMAGE:271038	RGS5
IMAGE:241097	unknown		IMAGE:281449	LOC51136
IMAGE:2412851	VAV1		IMAGE:122915	LOC286411
IMAGE:2417330	CD52		IMAGE:258101	FLT1
IMAGE:243816	CD36		IMAGE:234011	PKP2
IMAGE:244044	C1QC		IMAGE:1650998	PTPRB
IMAGE:2444518	PPAP2C		IMAGE:1680549	MXI1
IMAGE:244703	ITGBL1		IMAGE:838048	unknown
IMAGE:2448791	SPRR1A		IMAGE:2316138	D2LIC
IMAGE:2449841	LY6D		IMAGE:243816	CD36
IMAGE:2450105	CCL21		IMAGE:504575	WDFY3
IMAGE:2457025	PDPN		IMAGE:796198	EFNB2
IMAGE:2460366	UPK3A		IMAGE:504420	ARGBP2
IMAGE:2461316	CST7		IMAGE:813721	KIAA0934
IMAGE:2467312	TMEM97		IMAGE:364436	PITPNC1
IMAGE:248691	unknown		IMAGE:138672	unknown
IMAGE:2488854	TP63		IMAGE:42558	GATM
IMAGE:2489436	MYLK		IMAGE:85394	PPAP2B
IMAGE:2490569	DES		IMAGE:232842	PELI1
IMAGE:2492383	WNT5A		IMAGE:768523	MGC14276
IMAGE:2511237	FBLN2		IMAGE:1882051	AFTIPHILIN
IMAGE:2514320	ENOX2		IMAGE:595637	ARID5B
IMAGE:25194	RAB27B		IMAGE:843036	MAP7
IMAGE:253507	IGSF10		IMAGE:788445	CYP4V2
IMAGE:253884	AMIGO2		IMAGE:845454	HOOK1
IMAGE:2557471	CRABP2		IMAGE:563701	MRPL19
IMAGE:2559479	UPK1B		IMAGE:2336208	ING3
IMAGE:2562279	IGHG1		IMAGE:755881	AQP5
IMAGE:2562939	SERPINF1		IMAGE:840663	HSPC159
IMAGE:2565059	SPINK1		IMAGE:812294	unknown
IMAGE:2569190	FSTL1		IMAGE:1588859	PHTF1
IMAGE:2569884	C1S		IMAGE:264537	C9orf55
IMAGE:257003	KLRK1		IMAGE:290378	PODXL
IMAGE:2577882	TPM2		IMAGE:1537001	MGAT4A
IMAGE:2578894	KRT5		IMAGE:1525823	SIAT8D
IMAGE:259607	PRDM6		IMAGE:40562	SGCB
IMAGE:259884	GPR126		IMAGE:51920	OSBPL1A
IMAGE:265694	OLFML2B		IMAGE:277073	MAP7
IMAGE:27333	PDZRN4		IMAGE:267202	ZNF462
IMAGE:275798	ST3GAL5		IMAGE:302188	NEBL
IMAGE:277476	CST7		IMAGE:501994	IL1RL1
IMAGE:278430	KIF5C		IMAGE:1055460	PANK1
IMAGE:278956	NKAIN2		IMAGE:124405	AIG1
IMAGE:280217	TMEFF2		IMAGE:142259	OPTN
IMAGE:280782	CP		IMAGE:795757	unknown
IMAGE:281039	FABP5		IMAGE:364921	CTNND1
IMAGE:281190	unknown		IMAGE:412881	LOC55871
IMAGE:281521	unknown		IMAGE:1587715	unknown
IMAGE:281681	SHROOM1		IMAGE:1638475	PER2
IMAGE:28218	GABRG2		IMAGE:774181	TIMP3
IMAGE:283329	SEMA3A		IMAGE:1572838	KCNIP4
IMAGE:284101	unknown		IMAGE:78294	unknown
IMAGE:284383	SYNPO2		IMAGE:435824	INM01
IMAGE:284388	unknown		IMAGE:1908402	TAZ
IMAGE:289337	IGHG1		IMAGE:1474023	JAG1
IMAGE:289936	SLC7A11		IMAGE:687270	MEF2C
IMAGE:291955	PTPLA		IMAGE:29258	unknown
IMAGE:292637	unknown		IMAGE:758318	FBXO3
IMAGE:293925	unknown		IMAGE:416676	PELI1
IMAGE:294535	MS4A6A		IMAGE:291965	WASPIP
IMAGE:295410	PVT1		IMAGE:503741	LIFR
IMAGE:299394	unknown		IMAGE:430968	ENPP3
IMAGE:299629	unknown		IMAGE:898228	unknown
IMAGE:300661	RAB9B		IMAGE:461761	RNASE4
IMAGE:306841	IL23A		IMAGE:471372	SLC35A3
IMAGE:307053	OGN		IMAGE:281706	BTBD7
IMAGE:307255	C1orf38		IMAGE:609366	MXI1
IMAGE:309826	LAMA4		IMAGE:298155	ACADM
IMAGE:322016	MSX2		IMAGE:489102	EPIM
IMAGE:324901	WNT5A		IMAGE:810515	PTPRE
IMAGE:325375	SYNPO2		IMAGE:309469	SSH2
IMAGE:32576	unknown		IMAGE:813157	DKFZp547A023
IMAGE:327676	KRT13		IMAGE:757961	STX3A
IMAGE:340742	unknown		IMAGE:753301	CEACAM1
IMAGE:341588	unknown		IMAGE:869504	unknown
IMAGE:341821	unknown		IMAGE:785695	NDFIP2
IMAGE:342008	KRT13		IMAGE:210599	unknown
IMAGE:344134	IGLL1		IMAGE:824150	PSMB7
IMAGE:344139	FILIP1L		IMAGE:841620	DPYSL2
IMAGE:344589	unknown		IMAGE:366209	unknown
IMAGE:345234	ARHGAP30		IMAGE:447786	AUTS2
IMAGE:345670	unknown		IMAGE:823901	UVRAG
IMAGE:345925	KRT5		IMAGE:609525	ETV6
IMAGE:345957	CSTA		IMAGE:450938	DKFZP586A0522
IMAGE:346321	SCUBE2		IMAGE:284076	CREBL2
IMAGE:346917	GPR87		IMAGE:853358	unknown
IMAGE:347498	unknown		IMAGE:796078	MAPKAP1
IMAGE:357031	TNFAIP6		IMAGE:565379	GRB10
IMAGE:357278	WNT5A		IMAGE:280122	KIAA1345
IMAGE:358168	POLR1D		IMAGE:66977	AIG1
IMAGE:358842	RUNX3		IMAGE:789369	ID4
IMAGE:359457	TAGLN		IMAGE:884903	VPS13A
IMAGE:361323	RGS1		IMAGE:162308	CYYR1
IMAGE:364098	unknown		IMAGE:83358	unknown
IMAGE:366889	KRT17		IMAGE:1591643	UGT2B7
IMAGE:366944	DGKA		IMAGE:77325	DHX30
IMAGE:376643	unknown		IMAGE:502978	MOBKL2B
IMAGE:377275	TRIM29		IMAGE:291083	MOBKL2B
IMAGE:377346	unknown		IMAGE:24033	unknown
IMAGE:377461	unknown		IMAGE:345645	PDGFB
IMAGE:377560	CD3D		IMAGE:66978	unknown
IMAGE:377642	SNCG		IMAGE:1492276	RNASE4
IMAGE:377692	MFAP5		IMAGE:310105	IFIT5
IMAGE:377701	unknown		IMAGE:1638993	NRF1
IMAGE:378365	PERP		IMAGE:298134	FZD1
IMAGE:38925	unknown		IMAGE:384088	KIAA0711
IMAGE:399075	MUSTN1		IMAGE:897963	KIAA0052
IMAGE:399331	FAM129A		IMAGE:32110	ABCG2
IMAGE:399577	PKP1		IMAGE:897271	KL
IMAGE:399898	unknown		IMAGE:701629	TCF4
IMAGE:413080	unknown		IMAGE:342720	SNRK
IMAGE:41344	VSIG4		IMAGE:841220	unknown
IMAGE:416374	TSPAN13		IMAGE:435160	PSMA7
IMAGE:418193	unknown		IMAGE:843374	STOM
IMAGE:430465	CCL19		IMAGE:82290	C9orf42
IMAGE:447171	IKZF1		IMAGE:2516036	ABLIM1
IMAGE:448021	KLHL6		IMAGE:141815	JAG1
IMAGE:450193	FAIM3		IMAGE:284022	unknown
IMAGE:450974	LYVE1		IMAGE:1915749	GMFG
IMAGE:451753	PGM5		IMAGE:196189	CYB5
IMAGE:454580	CYP2J2		IMAGE:23794	RAB11FIP3
IMAGE:462325	ACSL5		IMAGE:1925760	PTEN
IMAGE:462939	unknown		IMAGE:123755	ERG
IMAGE:469177	SYNPO2		IMAGE:137457	NFATC3
IMAGE:470122	KCNMB1		IMAGE:627509	CDKN1B
IMAGE:471855	LUM		IMAGE:2010684	unknown
IMAGE:47781	unknown		IMAGE:269663	unknown
IMAGE:485854	CHRDL1		IMAGE:812161	PARD6G
IMAGE:485985	ACTA2		IMAGE:741790	AFTIPHILIN
IMAGE:486493	GPR124		IMAGE:2569701	RGS5
IMAGE:486676	unknown		IMAGE:878182	A2M
IMAGE:487117	OGN		IMAGE:501540	ARID5B
IMAGE:487151	unknown		IMAGE:135640	STX3A
IMAGE:487458	unknown		IMAGE:1114524	LOC146517
IMAGE:487766	MS4A6A		IMAGE:209756	SAP18
IMAGE:487794	SYNPO2		IMAGE:46355	LOC57146
IMAGE:488130	SYNPO2		IMAGE:289016	MAGI1
IMAGE:488258	COL16A1		IMAGE:1688537	FBXO31
IMAGE:488370	COL3A1		IMAGE:450998	unknown
IMAGE:489631	unknown		IMAGE:1758233	RGS4
IMAGE:489668	GJC1		IMAGE:194399	GAB1
IMAGE:489800	SCARA5		IMAGE:46265	unknown
IMAGE:490525	CORIN		IMAGE:1585904	FLJ11200
IMAGE:491742	WFDC1		IMAGE:489519	TIMP3
IMAGE:49728	PVT1		IMAGE:1629535	DZIP3
IMAGE:502177	MYH11		IMAGE:140064	LRCH1
IMAGE:502287	unknown		IMAGE:248545	GSTA2
IMAGE:502367	FBLN1		IMAGE:131979	EPAS1
IMAGE:502791	ZAK		IMAGE:489947	MXI1
IMAGE:50282	MAP1B		IMAGE:796199	AHI1
IMAGE:503078	MMP23B		IMAGE:52021	DACH1
IMAGE:503671	MARCKS		IMAGE:62093	unknown
IMAGE:505076	PDPN		IMAGE:530197	LOC134147
IMAGE:505202	unknown		IMAGE:289677	PFAAP5
IMAGE:505235	PDLIM3		IMAGE:785986	unknown
IMAGE:510116	S100P		IMAGE:271478	MXI1
IMAGE:510336	FXYD3		IMAGE:1636606	UGT2B7
IMAGE:511967	ERN2		IMAGE:435219	MXI1
IMAGE:526134	ITGB4		IMAGE:431208	MAML2
IMAGE:52708	RAB9B		IMAGE:1523140	NLGN1
IMAGE:545749	BCAS1		IMAGE:290555	CLK4
IMAGE:587847	GPX2		IMAGE:199558	DHRS6
IMAGE:588460	FXYD3		IMAGE:782193	LATS2
IMAGE:588897	unknown		IMAGE:488945	unknown
IMAGE:590242	DDR2		IMAGE:366966	PTEN
IMAGE:592540	KRT5		IMAGE:812143	FLRT3
IMAGE:592777	FER1L4		IMAGE:1493181	HSPC129
IMAGE:611532	TNNI2		IMAGE:785535	PIAS1
IMAGE:629906	OGN		IMAGE:246543	unknown
IMAGE:66560	IGL@		IMAGE:811890	SLK
IMAGE:665658	MSX2		IMAGE:151240	unknown
IMAGE:665738	unknown		IMAGE:564898	NLGN1
IMAGE:666061	LPAR1		IMAGE:1031747	ALKBH
IMAGE:666879	ANXA8L1		IMAGE:841695	CG018
IMAGE:66852	unknown		IMAGE:741954	SLC25A23
IMAGE:669375	DKK1		IMAGE:767721	FLJ32810
IMAGE:69279	TAC3		IMAGE:1638455	unknown
IMAGE:712246	PTPRC		IMAGE:70152	DKFZP586A0522
IMAGE:713129	GZMA		IMAGE:530185	CD83
IMAGE:724888	CYP4B1		IMAGE:292068	SRP46
IMAGE:726391	SNCG		IMAGE:713347	DKFZp434H2111
IMAGE:726779	CNN1		IMAGE:139861	CREBL2
IMAGE:727292	CD163		IMAGE:1926217	PLEKHA1
IMAGE:727988	CD52		IMAGE:46070	unknown
IMAGE:731020	unknown		IMAGE:786544	HNRPDL
IMAGE:731311	CCDC80		IMAGE:814417	MLL5
IMAGE:739578	LYPD3		IMAGE:61502	PVRL3
IMAGE:740251	unknown		IMAGE:138104	PRRG4
IMAGE:740851	unknown		IMAGE:723955	EFNB2
IMAGE:740941	C10orf116		IMAGE:782812	IFNAR1
IMAGE:741831	PLTP		IMAGE:346902	ZNF11B
IMAGE:741987	unknown		IMAGE:200599	unknown
IMAGE:743868	EFCAB4B		IMAGE:1759218	HBXIP
IMAGE:746019	unknown		IMAGE:1456717	PKP4
IMAGE:746157	PM20D1		IMAGE:1669563	RFP2
IMAGE:753620	IGFBP6		IMAGE:322695	unknown
IMAGE:753982	unknown		IMAGE:448417	TNFRSF19
IMAGE:754491	CTSS		IMAGE:731125	unknown
IMAGE:755238	unknown		IMAGE:768940	ANKRD12
IMAGE:75644	unknown		IMAGE:839094	CRYBA1
IMAGE:756708	KCNN4		IMAGE:858998	NDFIP2
IMAGE:757191	unknown		IMAGE:841610	EIF4EBP2
IMAGE:759163	MFAP4		IMAGE:280769	GSTA4
IMAGE:759173	PYGM		IMAGE:841263	NUMB
IMAGE:759865	unknown		IMAGE:2549991	NME2
IMAGE:759873	LRRC17		IMAGE:77911	FLJ20366
IMAGE:76182	CCDC3		IMAGE:840970	KLEIP
IMAGE:768008	unknown		IMAGE:645956	C9orf87
IMAGE:768443	MGST1		IMAGE:812137	FLJ20331
IMAGE:771303	SNCG		IMAGE:253141	unknown
IMAGE:773469	PTGFRN		IMAGE:504421	ADFP
IMAGE:773771	PLN		IMAGE:786612	unknown
IMAGE:774078	LMOD1		IMAGE:1620748	SLC30A7
IMAGE:77915	PLA2G2A		IMAGE:815303	DARS
IMAGE:782701	unknown		IMAGE:197404	unknown
IMAGE:782972	unknown		IMAGE:1500370	C10orf118
IMAGE:784876	INA		IMAGE:812283	DIXDC1
IMAGE:785933	SRPX		IMAGE:283982	unknown
IMAGE:785975	unknown		IMAGE:234425	LOC253981
IMAGE:786695	GPR126		IMAGE:283995	UBE3A
IMAGE:788695	TNNT3		IMAGE:823902	TNFRSF21
IMAGE:789012	FBLN2		IMAGE:249517	unknown
IMAGE:795758	CRISPLD2		IMAGE:322461	ENPP5
IMAGE:796406	SORBS1		IMAGE:511633	DDX58
IMAGE:796718	DKFZP586H2123		IMAGE:814899	BNIP3L
IMAGE:796732	unknown		IMAGE:2312236	FAM8A1
IMAGE:80050	STEAP4		IMAGE:2578799	RPS2
IMAGE:80186	IL23A		IMAGE:39798	SHMT1
IMAGE:80796	IGL@		IMAGE:823943	unknown
IMAGE:80948	unknown		IMAGE:143332	NPY1R
IMAGE:809719	CCDC80		IMAGE:1555201	FCHO2
IMAGE:809901	unknown		IMAGE:242823	LOC146517
IMAGE:810272	PPP1R12B		IMAGE:1914520	unknown
IMAGE:812008	MRVI1		IMAGE:162211	ABCD3
IMAGE:81289	ACTG2		IMAGE:277621	FLJ23518
IMAGE:813266	unknown		IMAGE:221694	unknown
IMAGE:813276	TP63		IMAGE:395539	unknown
IMAGE:813286	unknown		IMAGE:278483	TYMS
IMAGE:813414	SERPINA12		IMAGE:666371	THBS1
IMAGE:813823	LUM		IMAGE:1325813	unknown
IMAGE:814341	unknown		IMAGE:1569150	PFTK1
IMAGE:823615	unknown		IMAGE:82710	GSTA2
IMAGE:824340	unknown		IMAGE:843109	FARS1
IMAGE:825223	HOPX		IMAGE:136984	unknown
IMAGE:826303	DAPP1		IMAGE:1500416	ATP11A
IMAGE:827132	RAC2		IMAGE:1636851	unknown
IMAGE:839991	COL1A2		IMAGE:269269	TGFBR3
IMAGE:840460	IL7R		IMAGE:713078	DGKQ
IMAGE:840677	HLA-C		IMAGE:826622	LKAP
IMAGE:841238	IL7R		IMAGE:295323	unknown
IMAGE:84295	IL1RN		IMAGE:786530	C14orf154
IMAGE:843098	BASP1		IMAGE:322443	SLC16A9
IMAGE:843321	KRT7		IMAGE:193182	TACC1
IMAGE:844680	TRA@		IMAGE:1635099	SLC5A12
IMAGE:84786	FOXA1		IMAGE:504300	FLT1
IMAGE:853367	PRRX1		IMAGE:428338	INADL
IMAGE:854338	CHI3L2		IMAGE:1635920	SLC16A9
IMAGE:854831	unknown		IMAGE:32989	DKFZP564A022
IMAGE:855745	IGHG1		IMAGE:745437	MGC33302
IMAGE:856115	PSCA		IMAGE:83649	unknown
IMAGE:857612	HSPB6		IMAGE:1472743	LGALS2
IMAGE:868124	unknown		IMAGE:148960	DKFZp761C169
IMAGE:868168	PCYOX1		IMAGE:1690055	EPHA5
IMAGE:868212	TGFBI		IMAGE:594120	PDK4
IMAGE:868838	HPGD		IMAGE:2556526	DSCR1
IMAGE:878097	GABBR2		IMAGE:742743	LOC253981
IMAGE:878836	unknown		IMAGE:139883	KIAA1754
IMAGE:898305	NBL1		IMAGE:241874	FLJ12592
IMAGE:916834	SCUBE2		IMAGE:40038	unknown
IMAGE:982757	unknown		IMAGE:841334	STIP1
IMAGE:984370	PSCA		IMAGE:840442	DC36
IMAGE:986643	PRRX2		IMAGE:1160531	ERBB3
			IMAGE:417884	CYP4V2
			IMAGE:243291	unknown
			IMAGE:36387	ALDH9A1
			IMAGE:320857	KCNJ2
			IMAGE:812068	CYP4V2
			IMAGE:813266	FHL1
			IMAGE:282996	KIAA0240
			IMAGE:795552	HIBCH
			IMAGE:841332	ARHGDIB
			IMAGE:322128	RAB21
			IMAGE:810008	DZIP3
			IMAGE:322615	DKFZP564D172
			IMAGE:624379	RHOBTB1
			IMAGE:120106	CASP1
			IMAGE:31093	CDH13
			IMAGE:46715	unknown
			IMAGE:1902820	VPS13A
			IMAGE:712314	MYLIP
			IMAGE:788745	DCTN6
			IMAGE:79848	NEDD9
			IMAGE:853998	EVA1
			IMAGE:38569	CPNE8
			IMAGE:454701	CHD9
			IMAGE:183337	HLA-DMA
			IMAGE:1636072	JTB
			IMAGE:682045	STARD13
			IMAGE:324307	TM4SF10
			IMAGE:243741	UBD
			IMAGE:143426	RHOB
			IMAGE:256284	NRAS
			IMAGE:247240	C19orf13
			IMAGE:868652	C4A
			IMAGE:268700	unknown
			IMAGE:1582738	EAF2
			IMAGE:813631	TM7SF3
			IMAGE:198033	unknown
			IMAGE:196038	LOC129285
			IMAGE:773605	2009-09-11
			IMAGE:626326	SNRPN
			IMAGE:83180	IRF2BP2
			IMAGE:488033	DNAJB9
			IMAGE:229856	CEPT1
			IMAGE:785693	LOC128153
			IMAGE:2296063	KIAA0528
			IMAGE:80318	SP1
			IMAGE:342712	KIAA0494
			IMAGE:564549	BLMH
			IMAGE:210610	CEP1
			IMAGE:40537	ZNF510
			IMAGE:207808	NFATC3
			IMAGE:1632056	ZNF552
			IMAGE:141845	CRIM1
			IMAGE:39586	C19orf13
			IMAGE:295824	FLJ11848
			IMAGE:132165	C10orf32
			IMAGE:813678	SLC1A3
			IMAGE:759159	RGS5
			IMAGE:869187	EPAS1
			IMAGE:503033	BTBD7
			IMAGE:328810	PPM1E
			IMAGE:141562	SLC16A4
			IMAGE:1940425	FLJ32810
			IMAGE:1521459	LOC126661
			IMAGE:47900	IFNGR1
			IMAGE:453602	CALD1
			IMAGE:727551	IRF2
			IMAGE:1592953	JAK1
			IMAGE:2139152	RAPGEF2
			1240243	C1orf25
			IMAGE:785530	PELO
			IMAGE:1571882	unknown
			IMAGE:136954	FLJ90013
			IMAGE:292939	ZBTB4
			IMAGE:328768	HS2ST1
			IMAGE:744944	MYO6

## Sheet: CSR and SPC
CSR genes			SPC genes			Overlapping
ID	Name		ID	Name		CLID	NAME
IMAGE:809894	ACAS2		IMAGE:1636365	TMEM27		IMAGE:232586	unknown
IMAGE:417404	ACINUS		IMAGE:757374	FRMD3		IMAGE:78353	MT1F
IMAGE:144797	ADAMTS1		IMAGE:682063	ZNF189		IMAGE:1900149	RNF41
IMAGE:796323	ADD3		IMAGE:1033767	unknown		IMAGE:1899230	MT1L
IMAGE:1558492	AIP1		IMAGE:824769	SLA/LP		IMAGE:854122	ARSD
IMAGE:245174	ALEX3		IMAGE:2338271	NFIA		IMAGE:755145	VIL2
IMAGE:251452	ALEX3		IMAGE:841226	IVNS1ABP		IMAGE:324225	RARRES3
IMAGE:283233	ALEX3		IMAGE:308004	NPR3		IMAGE:80484	P8
IMAGE:785342	ALEX3		IMAGE:813154	NFIA		IMAGE:783698	LPIN1
IMAGE:1942271	AND-1		IMAGE:813265	NFIB		IMAGE:289505	LOC201895
IMAGE:159608	APOD		IMAGE:45376	ACAA2		IMAGE:809894	ACAS2
IMAGE:838611	APOD		IMAGE:1553996	LRP2		IMAGE:810791	MNAT1
IMAGE:323371	APP		IMAGE:347687	SGCB		IMAGE:2028294	MTHFD1
IMAGE:2316441	ARHC		IMAGE:489201	PPAP2B		IMAGE:469297	BHLHB2
IMAGE:290050	ARHGAP12		IMAGE:855658	FZD1		IMAGE:665445	SUMF1
IMAGE:293745	ARHGEF3		IMAGE:788234	ID4		IMAGE:1942271	WDHD1
IMAGE:770377	ATP6V0A1		IMAGE:2514707	IVNS1ABP		IMAGE:195040	SLC22A3
IMAGE:1585327	AXIN2		IMAGE:450859	MAML2		IMAGE:970591	HMGB1
IMAGE:753400	BAF53A		IMAGE:1762111	NPR3		IMAGE:251452	ARMCX3
IMAGE:2326129	BBC3		IMAGE:1740567	unknown		IMAGE:265060	KIT
IMAGE:415437	BCCIP		IMAGE:269300	DDAH1		IMAGE:1526789	MYBL1
IMAGE:201727	BCL6		IMAGE:767804	ALDH3A2		IMAGE:260696	HRB2
IMAGE:826182	BCL6		IMAGE:81417	RNASE4		IMAGE:782460	DCBLD2
IMAGE:230376	BF		IMAGE:366763	LCHN		IMAGE:265494	DCBLD2
IMAGE:138728	BHC80		IMAGE:303139	FLJ14054		IMAGE:263200	DCBLD2
IMAGE:469297	BHLHB2		IMAGE:261492	LCHN		IMAGE:754588	MGC4308
IMAGE:448036	BM039		IMAGE:505864	RGL1		IMAGE:1928791	F3
IMAGE:970649	BM039		IMAGE:1553346	HNMT		IMAGE:842973	PA2G4
IMAGE:1456155	BOCT		IMAGE:812959	PWDMP		IMAGE:626841	MET
IMAGE:711698	BRCA2		IMAGE:1554501	ADAMTS9		IMAGE:785819	MRPS6
IMAGE:1844857	BRIP1		IMAGE:293819	DHRS6		IMAGE:839882	MRPS6
IMAGE:726860	C11orf14		IMAGE:840776	SGK		IMAGE:366042	PBXIP1
IMAGE:306446	C11orf24		IMAGE:324122	ESM1		IMAGE:70152	DKFZP586A0522
IMAGE:242840	C13orf1		IMAGE:325111	HAK		IMAGE:79412	C5orf4
IMAGE:195813	C1orf33		IMAGE:773293	unknown		IMAGE:741954	SLC25A23
IMAGE:377346	C1S		IMAGE:321900	unknown		IMAGE:249949	H2AFV
IMAGE:85634	C1S		IMAGE:257312	AD031		IMAGE:298409	FABP3
IMAGE:80692	C20orf108		IMAGE:202577	HNMT		IMAGE:33122	TBRG1
IMAGE:79412	C5orf4		IMAGE:454698	FZD4		IMAGE:841238	unknown
IMAGE:24208	C6orf55		IMAGE:280907	ZNF248		IMAGE:346834	FLJ10618
IMAGE:121136	C8orf13		IMAGE:487301	FBXL5		IMAGE:713031	RNU22
IMAGE:27516	CAMLG		IMAGE:742685	DAB2		IMAGE:290162	ANKRD32
IMAGE:786084	CBX1		IMAGE:245860	NFIB		IMAGE:431477	CENPJ
IMAGE:823691	CCNG2		IMAGE:321434	FZD2		IMAGE:742806	TFDP2
IMAGE:120362	CCNL2		IMAGE:427812	INSR		IMAGE:530237	LOC339924
IMAGE:884425	CCT5		IMAGE:1604717	unknown		IMAGE:32887	KIAA1363
IMAGE:1031142	CDC14B		IMAGE:415816	MYO9A		IMAGE:1670954	KIAA1363
IMAGE:731127	CDC14B		IMAGE:130541	PECAM1		IMAGE:200741	KIAA1363
IMAGE:781061	CDC14B		IMAGE:752668	unknown		IMAGE:273546	PAICS
IMAGE:814072	CDCA4		IMAGE:868078	NFIB		IMAGE:462961	DHFR
IMAGE:2308346	CDK2		IMAGE:234036	FBXL5		IMAGE:242840	C13orf1
IMAGE:268652	CDKN1A		IMAGE:2283651	TM4SF12		IMAGE:796996	IGBP1
IMAGE:147744	CDKN1C		IMAGE:1517749	YPEL2		IMAGE:2316683	LOC93081
IMAGE:431477	CENPJ		IMAGE:301995	unknown		IMAGE:69378	EGFR
IMAGE:429784	CGI-121		IMAGE:342181	BCL2		IMAGE:1474390	unknown
IMAGE:246524	CHEK1		IMAGE:85614	LEPROTL1		IMAGE:810326	C17orf27
IMAGE:812244	CKLF		IMAGE:595181	MYLIP		IMAGE:50276	C17orf27
IMAGE:288888	CL640		IMAGE:502164	KIAA0303		IMAGE:1581420	PARP14
IMAGE:824755	CLCN6		IMAGE:785868	FLT1		IMAGE:196012	GLS
IMAGE:1915913	CLIC2		IMAGE:377518	DKFZp762A217		IMAGE:627401	TNFAIP8
IMAGE:470279	CNTNAP1		IMAGE:191107	unknown		IMAGE:270136	DLEU2
IMAGE:1602675	COPS6		IMAGE:343760	SH3BGRL2		IMAGE:586731	SDFR1
IMAGE:511647	CORO1C		IMAGE:300276	DHRS8		IMAGE:786573	GRB2
IMAGE:813490	CORO1C		IMAGE:214858	LDB2		IMAGE:753400	ACTL6A
IMAGE:144849	COTL1		IMAGE:49665	EDNRB		IMAGE:488017	MFGE8
IMAGE:489823	COX17		IMAGE:376875	FMO1		IMAGE:825356	SNAG1
IMAGE:85313	CPR8		IMAGE:785351	ENPP2		IMAGE:266696	TCTEL1
IMAGE:768262	CRTAP		IMAGE:2013515	SGK		IMAGE:1631194	TCTEL1
IMAGE:1475574	CSF1		IMAGE:768619	PLEKHA2		IMAGE:896978	DCLRE1B
IMAGE:73527	CSF1		IMAGE:279985	WDFY3		IMAGE:812244	CKLF
IMAGE:949938	CST3		IMAGE:704440	FLJ23861		IMAGE:1915913	CLIC2
IMAGE:269997	CTNS		IMAGE:866674	unknown		IMAGE:502333	NCOA3
IMAGE:1571993	CTSF		IMAGE:296508	MYO9A		IMAGE:786078	POLE2
IMAGE:295843	CYP27A1		IMAGE:823696	IFIT1		IMAGE:1474424	FAM33A
IMAGE:624390	DC13		IMAGE:416096	FLJ10847		IMAGE:823688	MAN1A1
IMAGE:43198	DCK		IMAGE:280831	DGKH		IMAGE:823659	FYCO1
IMAGE:896978	DCLRE1B		IMAGE:745983	unknown		IMAGE:295473	POLE3
IMAGE:245774	DEPP		IMAGE:81316	ARG99		IMAGE:595637	ARID5B
IMAGE:462961	DHFR		IMAGE:79022	FOSB		IMAGE:144797	ADAMTS1
IMAGE:199558	DHRS6		IMAGE:812256	TMOD2		IMAGE:141815	JAG1
IMAGE:1724716	DKFZP434B103		IMAGE:754106	TIMP3		IMAGE:823655	DKFZp434L142
IMAGE:823655	DKFZp434L142		IMAGE:416325	unknown		IMAGE:1534435	TIMP2
IMAGE:1636060	DKFZP434O1427		IMAGE:1553540	C19orf28		IMAGE:838446	CYBRD1
IMAGE:136070	DKFZP586A0522		IMAGE:504791	GSTA4		IMAGE:486493	GPR124
IMAGE:70152	DKFZP586A0522		IMAGE:752903	KIAA0303		IMAGE:364436	PITPNC1
IMAGE:2062453	DKFZP727G051		IMAGE:969495	EPB41L4A		IMAGE:841620	DPYSL2
IMAGE:359504	DKFZp761L1417		IMAGE:797012	SUI1		IMAGE:773605	2009-09-11
IMAGE:196148	DKFZp762H185		IMAGE:156404	LRP2		IMAGE:549146	TRIM22
IMAGE:773383	DLEU1		IMAGE:810090	unknown		IMAGE:796323	ADD3
IMAGE:270136	DLEU2		IMAGE:1505692	RGS5		IMAGE:81332	MSN
IMAGE:755228	DNM1		IMAGE:209758	MME		IMAGE:131362	MSN
IMAGE:767268	DPP7		IMAGE:46411	FARP1		IMAGE:240748	DUSP22
IMAGE:841620	DPYSL2		IMAGE:510729	PTPN21		IMAGE:85060	SQRDL
IMAGE:240748	DUSP22		IMAGE:853809	RGS5		IMAGE:502067	KIAA0342
IMAGE:773678	DUT		IMAGE:53092	SLC3A1		IMAGE:291394	TRPA1
IMAGE:22918	EBNA1BP2		IMAGE:1324438	UGT2B7		IMAGE:196634	PTPLB
IMAGE:306921	EEF1E1		IMAGE:1492652	FLJ23861		IMAGE:328889	MBP
IMAGE:2017769	EIF4EBP1		IMAGE:815245	TTC10		IMAGE:308466	SARA2
IMAGE:25988	EIF4G1		IMAGE:245147	FGD5		IMAGE:810486	unknown
IMAGE:109863	EMP2		IMAGE:44477	VCAM1		IMAGE:813584	SESN1
IMAGE:502682	ENIGMA		IMAGE:781468	DKFZP434F0318		IMAGE:40120	RAB11FIP2
IMAGE:1637756	ENO1		IMAGE:868472	CLIC4		IMAGE:73784	ITGA6
IMAGE:392678	ENO1		IMAGE:194342	PTD012		IMAGE:510794	MYCBP
IMAGE:153541	EPHB1		IMAGE:283430	HACE1		IMAGE:757144	HNRPA3
IMAGE:248454	ERP70		IMAGE:246430	UGT2B4		IMAGE:814528	TP53INP1
IMAGE:263200	ESDN		IMAGE:813187	DDAH1		IMAGE:266263	unknown
IMAGE:265494	ESDN		IMAGE:323806	unknown		IMAGE:1558625	unknown
IMAGE:782460	ESDN		IMAGE:33182	unknown		IMAGE:340745	unknown
IMAGE:310519	F10		IMAGE:2550047	IFIT1		IMAGE:768466	RRM2B
IMAGE:1928791	F3		IMAGE:756370	EHBP1		IMAGE:853968	PF6
IMAGE:298409	FABP3		IMAGE:701710	TCF4		IMAGE:746245	PTPLB
IMAGE:1758590	FACL3		IMAGE:1324446	EVA1		IMAGE:413299	NUPL1
IMAGE:310493	FACL3		IMAGE:418049	CLCN5		IMAGE:786084	CBX1
IMAGE:49944	FACL3		IMAGE:108422	SH3YL1		IMAGE:327350	HNRPA2B1
IMAGE:782503	FADS1		IMAGE:143661	NTN4		IMAGE:306921	EEF1E1
IMAGE:128329	FADS2		IMAGE:838240	C1orf39		IMAGE:796176	LSM3
IMAGE:878174	FADS2		IMAGE:149745	unknown		IMAGE:285686	PSMD14
IMAGE:358643	FARSL		IMAGE:416959	NFIB		IMAGE:142586	MCTS1
IMAGE:68894	FCGRT		IMAGE:197959	SGCB		IMAGE:1664710	FLJ10292
IMAGE:770394	FCGRT		IMAGE:50926	SH3BGRL2		IMAGE:431803	SNRPE
IMAGE:80410	FDPS		IMAGE:49164	VCAM1		IMAGE:47542	SNRPD1
IMAGE:842767	FLJ10036		IMAGE:377468	SPRY1		IMAGE:2315147	H2AFZ
IMAGE:1664710	FLJ10292		IMAGE:364209	ANK3		IMAGE:823691	CCNG2
IMAGE:824126	FLJ10407		IMAGE:897557	HNRPH3		IMAGE:773383	DLEU1
IMAGE:346834	FLJ10618		IMAGE:1635600	CHC1L		IMAGE:827159	NUP107
IMAGE:773605	FLJ10849		IMAGE:124597	unknown		IMAGE:257955	NUP107
IMAGE:307328	FLJ10948		IMAGE:271050	EDNRB		IMAGE:824875	SH3BP3
IMAGE:1572724	FLJ10983		IMAGE:1688510	CLK4		IMAGE:290050	ARHGAP12
IMAGE:809383	FLJ11286		IMAGE:544502	IFIT1		IMAGE:502096	MGC39820
IMAGE:435619	FLJ12643		IMAGE:753692	ABLIM1		IMAGE:429784	CGI-121
IMAGE:1880814	FLJ12953		IMAGE:589853	NAP1L2		IMAGE:282720	EXOSC8
IMAGE:290057	FLJ14525		IMAGE:1553550	LOC123876		IMAGE:1601926	AZI2
IMAGE:810603	FLJ14525		IMAGE:767823	PALMD		IMAGE:768940	ANKRD12
IMAGE:1697632	FLJ20059		IMAGE:488404	unknown		IMAGE:1636060	RNF146
IMAGE:124242	FLJ20154		IMAGE:51763	MAML2		IMAGE:137602	MBTD1
IMAGE:812137	FLJ20331		IMAGE:785389	CTPS		IMAGE:815297	LOC153222
IMAGE:858915	FLJ21016		IMAGE:2350947	unknown		IMAGE:280763	unknown
IMAGE:1696374	FLJ21986		IMAGE:786672	RAPGEF5		IMAGE:788217	LOC134218
IMAGE:838446	FLJ23462		IMAGE:204735	unknown		IMAGE:290111	HMGCS1
IMAGE:782259	FLJ23468		IMAGE:812291	SGCB		IMAGE:898095	WTAP
IMAGE:320865	FLJ30532		IMAGE:666154	PDE8A		IMAGE:51918	NUP93
IMAGE:1941536	FLJ30574		IMAGE:45512	LOC283666		IMAGE:785342	ARMCX3
IMAGE:1474390	FLJ31033		IMAGE:1926246	LRCH1		IMAGE:283233	unknown
IMAGE:365177	FLJ32731		IMAGE:277414	MAF		IMAGE:245174	ARMCX3
IMAGE:788596	FLJ32915		IMAGE:452708	FLJ21934		IMAGE:760344	UMPS
IMAGE:767172	FLJ90754		IMAGE:365098	BNIP3L		IMAGE:857002	PNRC1
IMAGE:489509	FLJ90798		IMAGE:855389	TACC1		IMAGE:1574649	REV3L
IMAGE:2321104	FLNC		IMAGE:144834	MAP7		IMAGE:827141	NUP35
IMAGE:815072	FRSB		IMAGE:1650304	RICS		IMAGE:461098	SLC35E2
IMAGE:823659	FYCO1		IMAGE:594500	unknown		IMAGE:461144	LRIG2
IMAGE:81409	GABARAPL1		IMAGE:2238788	GOLGIN-67		IMAGE:786625	RNF138
IMAGE:298231	GABBR1		IMAGE:742611	MXI1		IMAGE:38072	unknown
IMAGE:42558	GATM		IMAGE:296587	HLF		IMAGE:429811	LOC115294
IMAGE:627401	GG2-1		IMAGE:271038	RGS5		IMAGE:24208	C6orf55
IMAGE:809588	GGH		IMAGE:281449	LOC51136		IMAGE:1572724	PGM2
IMAGE:196012	GLS		IMAGE:122915	LOC286411		IMAGE:796994	MCP
IMAGE:1636447	GNG11		IMAGE:258101	FLT1		IMAGE:298769	C10orf69
IMAGE:1656488	GPLD1		IMAGE:234011	PKP2		IMAGE:746080	KLHL5
IMAGE:486493	GPR124		IMAGE:1650998	PTPRB		IMAGE:812137	FLJ20331
IMAGE:214990	GSN		IMAGE:1680549	MXI1		IMAGE:511388	HECA
IMAGE:2315147	H2AFZ		IMAGE:838048	unknown		IMAGE:47681	SFRS10
IMAGE:249949	H2AV		IMAGE:2316138	D2LIC		IMAGE:815072	FARSLB
IMAGE:1679531	HAS2		IMAGE:243816	CD36		IMAGE:428223	MAPRE1
IMAGE:2116188	HDAC5		IMAGE:504575	WDFY3		IMAGE:1758590	ACSL3
IMAGE:511388	HECA		IMAGE:796198	EFNB2		IMAGE:49944	ACSL3
IMAGE:970591	HMGB1		IMAGE:504420	ARGBP2		IMAGE:310493	ACSL3
IMAGE:290111	HMGCS1		IMAGE:813721	KIAA0934		IMAGE:884425	CCT5
IMAGE:704519	HMGCS1		IMAGE:364436	PITPNC1		IMAGE:293745	ARHGEF3
IMAGE:73252	HMGCS1		IMAGE:138672	unknown		IMAGE:813636	HSPC051
IMAGE:1845630	HMGN2		IMAGE:42558	GATM		IMAGE:796263	PGCP
IMAGE:241826	HMGN2		IMAGE:85394	PPAP2B		IMAGE:260187	FLJ13273
IMAGE:489208	HN1L		IMAGE:232842	PELI1		IMAGE:305920	KIAA1109
IMAGE:855723	HN1L		IMAGE:768523	MGC14276		IMAGE:562115	ZNF36
IMAGE:327350	HNRPA2B1		IMAGE:1882051	AFTIPHILIN		IMAGE:755373	ZBTB17
IMAGE:453790	HNRPR		IMAGE:595637	ARID5B		IMAGE:73252	HMGCS1
IMAGE:260696	HRB2		IMAGE:843036	MAP7		IMAGE:754026	SMURF2
IMAGE:755581	HRI		IMAGE:788445	CYP4V2		IMAGE:2106955	PLK4
IMAGE:825695	HSPC111		IMAGE:845454	HOOK1		IMAGE:645702	unknown
IMAGE:786690	HSU79274		IMAGE:563701	MRPL19		IMAGE:323371	APP
IMAGE:221295	ID2		IMAGE:2336208	ING3		IMAGE:489208	C16orf34
IMAGE:756405	ID3		IMAGE:755881	AQP5		IMAGE:511647	CORO1C
IMAGE:44975	IDI1		IMAGE:840663	HSPC159		IMAGE:82434	TncRNA
IMAGE:809946	IFRD2		IMAGE:812294	unknown		IMAGE:44975	IDI1
IMAGE:796996	IGBP1		IMAGE:1588859	PHTF1		IMAGE:51320	MGC3101
IMAGE:138265	IL1R1		IMAGE:264537	C9orf55		IMAGE:121512	SF3B1
IMAGE:146671	IL1R1		IMAGE:290378	PODXL		IMAGE:858915	WDR26
IMAGE:2018581	IL6ST		IMAGE:1537001	MGAT4A		IMAGE:812088	NLN
IMAGE:753743	IL6ST		IMAGE:1525823	SIAT8D		IMAGE:415437	BCCIP
IMAGE:840460	IL7R		IMAGE:40562	SGCB		IMAGE:773308	CCDC5
IMAGE:814428	IMP4		IMAGE:51920	OSBPL1A		IMAGE:858375	C6orf49
IMAGE:207288	INSIG1		IMAGE:277073	MAP7		IMAGE:32641	ABHD5
IMAGE:471835	IPO4		IMAGE:267202	ZNF462		IMAGE:704519	HMGCS1
IMAGE:73784	ITGA6		IMAGE:302188	NEBL		IMAGE:85313	CCPG1
IMAGE:276091	ITPKB		IMAGE:501994	IL1RL1		IMAGE:486035	UAP1
IMAGE:141815	JAG1		IMAGE:1055460	PANK1		IMAGE:292515	UAP1
IMAGE:2027560	JTV1		IMAGE:124405	AIG1		IMAGE:855723	C16orf34
IMAGE:1474284	KAI1		IMAGE:142259	OPTN		IMAGE:341051	PNN
IMAGE:298769	KEO4		IMAGE:795757	unknown		IMAGE:788721	KIAA0090
IMAGE:788721	KIAA0090		IMAGE:364921	CTNND1		IMAGE:61626	LOC56902
IMAGE:51918	KIAA0095		IMAGE:412881	LOC55871		IMAGE:612274	TUBA1
IMAGE:41525	KIAA0323		IMAGE:1587715	unknown		IMAGE:843263	MRPL37
IMAGE:502067	KIAA0342		IMAGE:1638475	PER2		IMAGE:731290	MGC42105
IMAGE:813828	KIAA0367		IMAGE:774181	TIMP3		IMAGE:565235	SMS
IMAGE:768940	KIAA0874		IMAGE:1572838	KCNIP4		IMAGE:50743	TXNL2
IMAGE:487013	KIAA1036		IMAGE:78294	unknown		IMAGE:823598	PSMD12
IMAGE:305920	KIAA1109		IMAGE:435824	INM01		IMAGE:347373	TCEB1
IMAGE:502586	KIAA1228		IMAGE:1908402	TAZ		IMAGE:490772	SNRPA1
IMAGE:1581420	KIAA1268		IMAGE:1474023	JAG1		IMAGE:130895	LOC284018
IMAGE:754581	KIAA1305		IMAGE:687270	MEF2C		IMAGE:279616	unknown
IMAGE:1670954	KIAA1363		IMAGE:29258	unknown		IMAGE:772925	C1orf41
IMAGE:200741	KIAA1363		IMAGE:758318	FBXO3		IMAGE:279972	UBE2J1
IMAGE:32887	KIAA1363		IMAGE:416676	PELI1		IMAGE:487499	ZNF36
IMAGE:1916769	KIAA1536		IMAGE:291965	WASPIP		IMAGE:149934	STK17A
IMAGE:462845	KIAA1536		IMAGE:503741	LIFR		IMAGE:842767	FLJ10036
IMAGE:50276	KIAA1554		IMAGE:430968	ENPP3		IMAGE:277112	RFC3
IMAGE:877884	KIAA1720		IMAGE:898228	unknown		IMAGE:809535	SFRS2
IMAGE:1859050	KIAA1946		IMAGE:461761	RNASE4		IMAGE:811751	unknown
IMAGE:265060	KIT		IMAGE:471372	SLC35A3		IMAGE:210486	PDCD4
IMAGE:746080	KLHL5		IMAGE:281706	BTBD7		IMAGE:80410	FDPS
IMAGE:739230	LDB1		IMAGE:609366	MXI1		IMAGE:71863	SLC40A1
IMAGE:825295	LDLR		IMAGE:298155	ACADM		IMAGE:854701	LIPA
IMAGE:854701	LIPA		IMAGE:489102	EPIM		IMAGE:767277	PPIH
IMAGE:815501	LMNB2		IMAGE:810515	PTPRE		IMAGE:256619	HSD17B7
IMAGE:773308	LOC115106		IMAGE:309469	SSH2		IMAGE:813261	VAMP4
IMAGE:429811	LOC115294		IMAGE:813157	DKFZp547A023		IMAGE:278729	unknown
IMAGE:827141	LOC129401		IMAGE:757961	STX3A		IMAGE:42935	unknown
IMAGE:280763	LOC153222		IMAGE:753301	CEACAM1		IMAGE:486356	ZNF83
IMAGE:757431	LOC153222		IMAGE:869504	unknown		IMAGE:240480	unknown
IMAGE:815297	LOC153222		IMAGE:785695	NDFIP2		IMAGE:1898826	SFRS11
IMAGE:1502490	LOC169611		IMAGE:210599	unknown		IMAGE:824150	PSMB7
IMAGE:196634	LOC201562		IMAGE:824150	PSMB7		IMAGE:489947	MXI1
IMAGE:746245	LOC201562		IMAGE:841620	DPYSL2		IMAGE:277611	MXI1
IMAGE:295650	LOC201895		IMAGE:366209	unknown		IMAGE:271478	MXI1
IMAGE:1895046	LOC221810		IMAGE:447786	AUTS2		IMAGE:609366	MXI1
IMAGE:823815	LOC253263		IMAGE:823901	UVRAG		IMAGE:1680549	MXI1
IMAGE:130895	LOC284018		IMAGE:609525	ETV6		IMAGE:788445	CYP4V2
IMAGE:283124	LOC284436		IMAGE:450938	DKFZP586A0522		IMAGE:742685	DAB2
IMAGE:665445	LOC285362		IMAGE:284076	CREBL2		IMAGE:487793	MAF
IMAGE:530237	LOC339924		IMAGE:853358	unknown		IMAGE:277414	MAF
IMAGE:308466	LOC51128		IMAGE:796078	MAPKAP1		IMAGE:813828	KIAA0367
IMAGE:771142	LOC51279		IMAGE:565379	GRB10		IMAGE:42558	GATM
IMAGE:772925	LOC51668		IMAGE:280122	KIAA1345		IMAGE:108422	SH3YL1
IMAGE:274512	LOC56757		IMAGE:66977	AIG1		IMAGE:199558	DHRS6
IMAGE:61626	LOC56902		IMAGE:789369	ID4		IMAGE:454219	unknown
IMAGE:756554	LOC56926		IMAGE:884903	VPS13A		IMAGE:81417	RNASE4
IMAGE:2316683	LOC93081		IMAGE:162308	CYYR1		IMAGE:1564426	RPL37
IMAGE:882506	LOXL2		IMAGE:83358	unknown		IMAGE:295650	LOC201895
IMAGE:783698	LPIN1		IMAGE:1591643	UGT2B7		IMAGE:271699	WSB1
IMAGE:461144	LRIG2		IMAGE:77325	DHX30		IMAGE:146671	IL1R1
IMAGE:810551	LRP1		IMAGE:502978	MOBKL2B		IMAGE:138265	IL1R1
IMAGE:796176	LSM3		IMAGE:291083	MOBKL2B		IMAGE:753743	unknown
IMAGE:50175	LSM4		IMAGE:24033	unknown		IMAGE:2018581	IL6ST
IMAGE:462806	LSS		IMAGE:345645	PDGFB		IMAGE:811837	EEF1A1
IMAGE:770355	LSS		IMAGE:66978	unknown		IMAGE:1897944	TGFB1I4
IMAGE:471855	LUM		IMAGE:1492276	RNASE4		IMAGE:842989	MYL6
IMAGE:366009	LYAR		IMAGE:310105	IFIT5		IMAGE:320865	MARVELD2
IMAGE:277414	MAF		IMAGE:1638993	NRF1		IMAGE:1605407	WSB2
IMAGE:487793	MAF		IMAGE:298134	FZD1		IMAGE:795427	SERF2
IMAGE:823688	MAN1A1		IMAGE:384088	KIAA0711		IMAGE:1160558	PTS
IMAGE:340630	MAP3K8		IMAGE:897963	KIAA0052		IMAGE:79655	MEP50
IMAGE:428223	MAPRE1		IMAGE:32110	ABCG2		IMAGE:2027560	JTV1
IMAGE:328889	MBP		IMAGE:897271	KL		IMAGE:486221	VDAC1
IMAGE:809557	MCM3		IMAGE:701629	TCF4		IMAGE:321354	MRPL15
IMAGE:2325609	MCM7		IMAGE:342720	SNRK		IMAGE:773483	MRPS28
IMAGE:796994	MCP		IMAGE:841220	unknown		IMAGE:73531	ISCU
IMAGE:142586	MCT-1		IMAGE:435160	PSMA7		IMAGE:81409	GABARAPL1
IMAGE:448232	MEF2D		IMAGE:843374	STOM		IMAGE:729957	MKKS
IMAGE:79655	MEP50		IMAGE:82290	C9orf42		IMAGE:140957	MKKS
IMAGE:626841	MET		IMAGE:2516036	ABLIM1		IMAGE:489823	COX17
IMAGE:488017	MFGE8		IMAGE:141815	JAG1		IMAGE:624390	DC13
IMAGE:564981	MGC10200		IMAGE:284022	unknown		IMAGE:40017	CYCS
IMAGE:356835	MGC10500		IMAGE:1915749	GMFG		IMAGE:772304	SLC25A5
IMAGE:743362	MGC10974		IMAGE:196189	CYB5		IMAGE:361456	DDIT3
IMAGE:1642496	MGC11266		IMAGE:23794	RAB11FIP3		IMAGE:755581	JTV1
IMAGE:758314	MGC13047		IMAGE:1925760	PTEN		IMAGE:288888	CL640
IMAGE:769945	MGC13170		IMAGE:123755	ERG		IMAGE:1926715	unknown
IMAGE:813675	MGC14480		IMAGE:137457	NFATC3		IMAGE:80692	unknown
IMAGE:448344	MGC15429		IMAGE:627509	CDKN1B		IMAGE:129883	N2N
IMAGE:769796	MGC17330		IMAGE:2010684	unknown		IMAGE:207288	INSIG1
IMAGE:51320	MGC3101		IMAGE:269663	unknown		IMAGE:321905	SLC25A21
IMAGE:502096	MGC39820		IMAGE:812161	PARD6G		IMAGE:511632	POLR3K
IMAGE:271855	MGC4170		IMAGE:741790	AFTIPHILIN		IMAGE:767206	SSR3
IMAGE:754588	MGC4308		IMAGE:2569701	RGS5		IMAGE:292082	SSR3
IMAGE:1858892	MGC4825		IMAGE:878182	A2M		IMAGE:767289	WIPI49
IMAGE:742642	MIG-6		IMAGE:501540	ARID5B		IMAGE:590759	SC4MOL
IMAGE:140957	MKKS		IMAGE:135640	STX3A		IMAGE:682846	SMC2L1
IMAGE:729957	MKKS		IMAGE:1114524	LOC146517		IMAGE:1697632	DRE1
IMAGE:810791	MNAT1		IMAGE:209756	SAP18		IMAGE:1933716	SH3BP3
IMAGE:595637	MRF2		IMAGE:46355	LOC57146		IMAGE:788596	FLJ32915
IMAGE:1636069	MRPL12		IMAGE:289016	MAGI1		IMAGE:43198	DCK
IMAGE:843263	MRPL37		IMAGE:1688537	FBXO31		IMAGE:241826	HMGN2
IMAGE:755304	MRPS16		IMAGE:450998	unknown		IMAGE:2308346	CDK2
IMAGE:773483	MRPS28		IMAGE:1758233	RGS4		IMAGE:810133	unknown
IMAGE:131362	MSN		IMAGE:194399	GAB1		IMAGE:431805	SIAT1
IMAGE:81332	MSN		IMAGE:46265	unknown		IMAGE:364510	SATB1
IMAGE:78353	MT1F		IMAGE:1585904	FLJ11200		IMAGE:970649	BM039
IMAGE:2019011	MT3		IMAGE:489519	TIMP3		IMAGE:201727	BCL6
IMAGE:203008	MTH2		IMAGE:1629535	DZIP3		IMAGE:826182	BCL6
IMAGE:2028294	MTHFD1		IMAGE:140064	LRCH1		IMAGE:611028	RBMX
IMAGE:280934	MVD		IMAGE:248545	GSTA2		IMAGE:1616241	SCD
IMAGE:1680549	MXI1		IMAGE:131979	EPAS1		IMAGE:123474	SCD
IMAGE:271478	MXI1		IMAGE:489947	MXI1		IMAGE:810711	SCD
IMAGE:277611	MXI1		IMAGE:796199	AHI1		IMAGE:824126	FLJ10407
IMAGE:489947	MXI1		IMAGE:52021	DACH1		IMAGE:246524	CHEK1
IMAGE:609366	MXI1		IMAGE:62093	unknown		IMAGE:435619	C9orf81
IMAGE:1526789	MYBL1		IMAGE:530197	LOC134147		IMAGE:32134	DNAJC9
IMAGE:815526	MYBL2		IMAGE:289677	PFAAP5		IMAGE:742642	MIG-6
IMAGE:510794	MYCBP		IMAGE:785986	unknown		IMAGE:307328	FLJ10948
IMAGE:842989	MYL6		IMAGE:271478	MXI1		IMAGE:782737	USP44
IMAGE:1474424	na		IMAGE:1636606	UGT2B7		IMAGE:268978	OSBPL8
IMAGE:1553567	na		IMAGE:435219	MXI1		IMAGE:1892599	KIAA1190
IMAGE:1758226	na		IMAGE:431208	MAML2		IMAGE:824755	CLCN6
IMAGE:346860	na		IMAGE:1523140	NLGN1		IMAGE:1642496	MGC11266
IMAGE:78148	na		IMAGE:290555	CLK4		IMAGE:27516	CAMLG
IMAGE:788445	na		IMAGE:199558	DHRS6		IMAGE:470279	CNTNAP1
IMAGE:825356	na		IMAGE:782193	LATS2		IMAGE:298231	GABBR1
IMAGE:840708	na		IMAGE:488945	unknown		IMAGE:770394	FCGRT
IMAGE:502333	NCOA3		IMAGE:366966	PTEN		IMAGE:245774	C10orf10
IMAGE:73531	NIFU		IMAGE:812143	FLRT3		IMAGE:109863	EMP2
IMAGE:812088	NLN		IMAGE:1493181	HSPC129		IMAGE:147744	CDKN1C
IMAGE:845363	NME1		IMAGE:785535	PIAS1		IMAGE:471855	LUM
IMAGE:811097	NOLA2		IMAGE:246543	unknown		IMAGE:359457	TAGLN
IMAGE:756502	NUDT1		IMAGE:811890	SLK		IMAGE:359504	DKFZp761L1417
IMAGE:257955	NUP107		IMAGE:151240	unknown		IMAGE:740620	TPM2
IMAGE:827159	NUP107		IMAGE:564898	NLGN1		IMAGE:276091	ITPKB
IMAGE:413299	NUPL1		IMAGE:1031747	ALKBH		IMAGE:214990	GSN
IMAGE:1899230	NUTF2		IMAGE:841695	CG018		IMAGE:951007	LISCH7
IMAGE:282720	OIP2		IMAGE:741954	SLC25A23		IMAGE:898133	unknown
IMAGE:268978	OSBPL8		IMAGE:767721	FLJ32810		IMAGE:838611	APOD
IMAGE:80484	P8		IMAGE:1638455	unknown		IMAGE:159608	APOD
IMAGE:813584	PA26		IMAGE:70152	DKFZP586A0522		IMAGE:1696374	FLJ21986
IMAGE:842973	PA2G4		IMAGE:530185	CD83		IMAGE:141854	unknown
IMAGE:273546	PAICS		IMAGE:292068	SRP46		IMAGE:810859	NK4
IMAGE:366042	PBXIP1		IMAGE:713347	DKFZp434H2111		IMAGE:381066	SERPING1
IMAGE:243155	PCNT1		IMAGE:139861	CREBL2		IMAGE:810444	TNFAIP2
IMAGE:813460	PCSK7		IMAGE:1926217	PLEKHA1		IMAGE:665508	CCND3
IMAGE:824426	PDAP1		IMAGE:46070	unknown		IMAGE:745476	MCFP
IMAGE:49860	PDK2		IMAGE:786544	HNRPDL		IMAGE:392678	ENO1
IMAGE:950682	PFKP		IMAGE:814417	MLL5		IMAGE:1637756	ENO1
IMAGE:826173	PFN1		IMAGE:61502	PVRL3		IMAGE:855749	TPI1
IMAGE:796263	PGCP		IMAGE:138104	PRRG4		IMAGE:950682	PFKP
IMAGE:1533669	PHACS		IMAGE:723955	EFNB2		IMAGE:1502490	OLFML2A
IMAGE:364436	PITPNC1		IMAGE:782812	IFNAR1		IMAGE:1880814	FLJ12953
IMAGE:855557	PKIG		IMAGE:346902	ZNF11B		IMAGE:295843	CYP27A1
IMAGE:320355	PLA2R1		IMAGE:200599	unknown		IMAGE:511303	PLA2R1
IMAGE:511303	PLA2R1		IMAGE:1759218	HBXIP		IMAGE:786690	HSU79274
IMAGE:590154	PLAUR		IMAGE:1456717	PKP4		IMAGE:128054	unknown
IMAGE:810017	PLAUR		IMAGE:1669563	RFP2		IMAGE:782503	FADS1
IMAGE:159455	PLD3		IMAGE:322695	unknown		IMAGE:356835	YPEL3
IMAGE:195040	PLG		IMAGE:448417	TNFRSF19		IMAGE:365177	FLJ32731
IMAGE:263013	PLOD2		IMAGE:731125	unknown		IMAGE:809383	FLJ11286
IMAGE:2108411	PLU-1		IMAGE:768940	ANKRD12		IMAGE:85403	WBP2
IMAGE:755952	PLXNB1		IMAGE:839094	CRYBA1		IMAGE:120362	CCNL2
IMAGE:341051	PNN		IMAGE:858998	NDFIP2		IMAGE:770377	ATP6V0A1
IMAGE:786078	POLE2		IMAGE:841610	EIF4EBP2		IMAGE:1602675	COPS6
IMAGE:511632	POLR3K		IMAGE:280769	GSTA4		IMAGE:366009	LYAR
IMAGE:82556	POR		IMAGE:841263	NUMB		IMAGE:281039	FABP5
IMAGE:767277	PPIH		IMAGE:2549991	NME2		IMAGE:2012523	STX3A
IMAGE:857002	PROL2		IMAGE:77911	FLJ20366		IMAGE:810017	PLAUR
IMAGE:2054635	PSMA7		IMAGE:840970	KLEIP		IMAGE:453790	HNRPR
IMAGE:1602493	PSMC3		IMAGE:645956	C9orf87		IMAGE:2062453	PHF19
IMAGE:712916	PSMC3		IMAGE:812137	FLJ20331		IMAGE:950482	SNRPB
IMAGE:823598	PSMD12		IMAGE:253141	unknown		IMAGE:824756	RGS13
IMAGE:285686	PSMD14		IMAGE:504421	ADFP		IMAGE:1602493	PSMC3
IMAGE:809992	PSMD2		IMAGE:786612	unknown		IMAGE:811097	NOLA2
IMAGE:744800	PTPRU		IMAGE:1620748	SLC30A7		IMAGE:845363	NME1
IMAGE:1160558	PTS		IMAGE:815303	DARS		IMAGE:345833	HNRPAB
IMAGE:40120	Rab11-FIP2		IMAGE:197404	unknown		IMAGE:809466	TOMM40
IMAGE:324225	RARRES3		IMAGE:1500370	C10orf118		IMAGE:2054635	PSMA7
IMAGE:731136	RBM14		IMAGE:812283	DIXDC1		IMAGE:50175	LSM4
IMAGE:611028	RBMX		IMAGE:283982	unknown		IMAGE:755304	MRPS16
IMAGE:1574649	REV3L		IMAGE:234425	LOC253981		IMAGE:824426	PDAP1
IMAGE:277112	RFC3		IMAGE:283995	UBE3A		IMAGE:2316441	RHOC
IMAGE:512410	RNASEH2A		IMAGE:823902	TNFRSF21		IMAGE:207029	unknown
IMAGE:855243	RNASEP1		IMAGE:249517	unknown		IMAGE:195419	unknown
IMAGE:786625	RNF138		IMAGE:322461	ENPP5		IMAGE:278687	COPB2
IMAGE:1900149	RNF41		IMAGE:511633	DDX58		IMAGE:144849	COTL1
IMAGE:502690	RPN1		IMAGE:814899	BNIP3L		IMAGE:73527	KIAA0220
IMAGE:768466	RRM2B		IMAGE:2312236	FAM8A1		IMAGE:471835	IPO4
IMAGE:827011	RUVBL1		IMAGE:2578799	RPS2		IMAGE:344243	UCK2
IMAGE:364510	SATB1		IMAGE:39798	SHMT1		IMAGE:302933	ACTC
IMAGE:200012	SBP1		IMAGE:823943	unknown		IMAGE:108377	TUBG1
IMAGE:590759	SC4MOL		IMAGE:143332	NPY1R		IMAGE:724387	SNRPC
IMAGE:123474	SCD		IMAGE:1555201	FCHO2		IMAGE:826173	PFN1
IMAGE:1616241	SCD		IMAGE:242823	LOC146517		IMAGE:502690	RPN1
IMAGE:810711	SCD		IMAGE:1914520	unknown		IMAGE:248454	ERP70
IMAGE:1635538	SDC1		IMAGE:162211	ABCD3		IMAGE:2322223	SNRPA
IMAGE:586731	SDFR1		IMAGE:277621	FLJ23518		IMAGE:2108411	JARID1B
IMAGE:167205	SELENBP1		IMAGE:221694	unknown		IMAGE:138728	BHC80
IMAGE:754550	SEMACAP3		IMAGE:395539	unknown		IMAGE:30093	RANBP1
IMAGE:381066	SERPING1		IMAGE:278483	TYMS		IMAGE:1759582	TNFRSF12A
IMAGE:788232	SES2		IMAGE:666371	THBS1		IMAGE:135791	unknown
IMAGE:47681	SFRS10		IMAGE:1325813	unknown		IMAGE:878174	FADS2
IMAGE:809535	SFRS2		IMAGE:1569150	PFTK1		IMAGE:825659	DNAJB11
IMAGE:1584551	SFTPB		IMAGE:82710	GSTA2		IMAGE:809557	MCM3
IMAGE:486175	SLC16A1		IMAGE:843109	FARS1		IMAGE:782259	MLF1IP
IMAGE:772304	SLC25A5		IMAGE:136984	unknown		IMAGE:2325609	MCM7
IMAGE:461098	SLC35E2		IMAGE:1500416	ATP11A		IMAGE:448036	BM039
IMAGE:71863	SLC40A1		IMAGE:1636851	unknown		IMAGE:731136	RBM14
IMAGE:839882	SLC5A3		IMAGE:269269	TGFBR3		IMAGE:949938	CST3
IMAGE:378813	SLPI		IMAGE:713078	DGKQ		IMAGE:263013	PLOD2
IMAGE:682846	SMC2L1		IMAGE:826622	LKAP		IMAGE:230376	BF
IMAGE:565235	SMS		IMAGE:295323	unknown		IMAGE:771142	C1RL
IMAGE:754026	SMURF2		IMAGE:786530	C14orf154		IMAGE:85634	C1S
IMAGE:206370	SNRP70		IMAGE:322443	SLC16A9		IMAGE:377346	C1S
IMAGE:2322223	SNRPA		IMAGE:193182	TACC1		IMAGE:840708	unknown
IMAGE:490772	SNRPA1		IMAGE:1635099	SLC5A12		IMAGE:346860	SOD2
IMAGE:950482	SNRPB		IMAGE:504300	FLT1		IMAGE:78148	SOD2
IMAGE:724387	SNRPC		IMAGE:428338	INADL		IMAGE:813499	SSSCA1
IMAGE:47542	SNRPD1		IMAGE:1635920	SLC16A9		IMAGE:813490	CORO1C
IMAGE:431803	SNRPE		IMAGE:32989	DKFZP564A022		IMAGE:486175	SLC16A1
IMAGE:124781	SQLE		IMAGE:745437	MGC33302		IMAGE:195813	C1orf33
IMAGE:322643	SQRDL		IMAGE:83649	unknown		IMAGE:340630	MAP3K8
IMAGE:85060	SQRDL		IMAGE:1472743	LGALS2		IMAGE:503839	KIAA1295
IMAGE:856796	SRM		IMAGE:148960	DKFZp761C169		IMAGE:153541	EPHB1
IMAGE:292082	SSR3		IMAGE:1690055	EPHA5		IMAGE:768262	CRTAP
IMAGE:767206	SSR3		IMAGE:594120	PDK4		IMAGE:809588	GGH
IMAGE:813499	SSSCA1		IMAGE:2556526	DSCR1		IMAGE:221295	ID2
IMAGE:149934	STK17A		IMAGE:742743	LOC253981		IMAGE:726086	TFPI2
IMAGE:2106955	STK18		IMAGE:139883	KIAA1754		IMAGE:1636447	GNG11
IMAGE:754018	SVIL		IMAGE:241874	FLJ12592
IMAGE:359457	TAGLN		IMAGE:40038	unknown
IMAGE:33122	TBRG1		IMAGE:841334	STIP1
IMAGE:347373	TCEB1		IMAGE:840442	DC36
IMAGE:1631194	TCTEL1		IMAGE:1160531	ERBB3
IMAGE:266696	TCTEL1		IMAGE:417884	CYP4V2
IMAGE:726086	TFPI2		IMAGE:243291	unknown
IMAGE:502542	TIM50L		IMAGE:36387	ALDH9A1
IMAGE:1534435	TIMP2		IMAGE:320857	KCNJ2
IMAGE:810444	TNFAIP2		IMAGE:812068	CYP4V2
IMAGE:135791	TNFRSF12A		IMAGE:813266	FHL1
IMAGE:1759582	TNFRSF12A		IMAGE:282996	KIAA0240
IMAGE:271670	TNFSF12		IMAGE:795552	HIBCH
IMAGE:75644	TNXB		IMAGE:841332	ARHGDIB
IMAGE:809466	TOMM40		IMAGE:322128	RAB21
IMAGE:814528	TP53INP1		IMAGE:810008	DZIP3
IMAGE:855749	TPI1		IMAGE:322615	DKFZP564D172
IMAGE:488479	TPM1		IMAGE:624379	RHOBTB1
IMAGE:740620	TPM2		IMAGE:120106	CASP1
IMAGE:549146	TRIM22		IMAGE:31093	CDH13
IMAGE:1897944	TSC22		IMAGE:46715	unknown
IMAGE:612274	TUBA1		IMAGE:1902820	VPS13A
IMAGE:108377	TUBG1		IMAGE:712314	MYLIP
IMAGE:50743	TXNL2		IMAGE:788745	DCTN6
IMAGE:292515	UAP1		IMAGE:79848	NEDD9
IMAGE:486035	UAP1		IMAGE:853998	EVA1
IMAGE:279972	UBE2J1		IMAGE:38569	CPNE8
IMAGE:344243	UMPK		IMAGE:454701	CHD9
IMAGE:760344	UMPS		IMAGE:183337	HLA-DMA
IMAGE:813261	VAMP4		IMAGE:1636072	JTB
IMAGE:486221	VDAC1		IMAGE:682045	STARD13
IMAGE:755145	VIL2		IMAGE:324307	TM4SF10
IMAGE:85403	WBP2		IMAGE:243741	UBD
IMAGE:271699	WSB1		IMAGE:143426	RHOB
IMAGE:1605407	WSB2		IMAGE:256284	NRAS
IMAGE:898095	WTAP		IMAGE:247240	C19orf13
IMAGE:1933716	ZFP106		IMAGE:868652	C4A
IMAGE:824875	ZFP106		IMAGE:268700	unknown
IMAGE:755373	ZNF151		IMAGE:1582738	EAF2
IMAGE:461613	ZNF219		IMAGE:813631	TM7SF3
IMAGE:562115	ZNF36		IMAGE:198033	unknown
IMAGE:486356	ZNF83		IMAGE:196038	LOC129285
IMAGE:1034491	unknown		IMAGE:773605	2009-09-11
IMAGE:1664309	unknown		IMAGE:626326	SNRPN
IMAGE:1680098	unknown		IMAGE:83180	IRF2BP2
IMAGE:1881224	unknown		IMAGE:488033	DNAJB9
IMAGE:1926715	unknown		IMAGE:229856	CEPT1
IMAGE:195419	unknown		IMAGE:785693	LOC128153
IMAGE:2012523	unknown		IMAGE:2296063	KIAA0528
IMAGE:207029	unknown		IMAGE:80318	SP1
IMAGE:232586	unknown		IMAGE:342712	KIAA0494
IMAGE:246684	unknown		IMAGE:564549	BLMH
IMAGE:260187	unknown		IMAGE:210610	CEP1
IMAGE:278687	unknown		IMAGE:40537	ZNF510
IMAGE:279616	unknown		IMAGE:207808	NFATC3
IMAGE:281039	unknown		IMAGE:1632056	ZNF552
IMAGE:283751	unknown		IMAGE:141845	CRIM1
IMAGE:290162	unknown		IMAGE:39586	C19orf13
IMAGE:295473	unknown		IMAGE:295824	FLJ11848
IMAGE:30093	unknown		IMAGE:132165	C10orf32
IMAGE:302933	unknown		IMAGE:813678	SLC1A3
IMAGE:32134	unknown		IMAGE:759159	RGS5
IMAGE:321354	unknown		IMAGE:869187	EPAS1
IMAGE:321905	unknown		IMAGE:503033	BTBD7
IMAGE:32641	unknown		IMAGE:328810	PPM1E
IMAGE:345833	unknown		IMAGE:141562	SLC16A4
IMAGE:40017	unknown		IMAGE:1940425	FLJ32810
IMAGE:418279	unknown		IMAGE:1521459	LOC126661
IMAGE:454219	unknown		IMAGE:47900	IFNGR1
IMAGE:470930	unknown		IMAGE:453602	CALD1
IMAGE:645702	unknown		IMAGE:727551	IRF2
IMAGE:665508	unknown		IMAGE:1592953	JAK1
IMAGE:66852	unknown		IMAGE:2139152	RAPGEF2
IMAGE:687297	unknown		1240243	C1orf25
IMAGE:713031	unknown		IMAGE:785530	PELO
IMAGE:731290	unknown		IMAGE:1571882	unknown
IMAGE:745476	unknown		IMAGE:136954	FLJ90013
IMAGE:757144	unknown		IMAGE:292939	ZBTB4
IMAGE:810156	unknown		IMAGE:328768	HS2ST1
IMAGE:811999	unknown		IMAGE:744944	MYO6
IMAGE:813636	unknown
IMAGE:824132	unknown
IMAGE:824756	unknown
IMAGE:824917	unknown
IMAGE:825659	unknown
IMAGE:841238	unknown
IMAGE:853968	unknown
IMAGE:858375	unknown
IMAGE:897680	unknown
IMAGE:108422	unknown
IMAGE:121512	unknown
IMAGE:128054	unknown
IMAGE:129883	unknown
IMAGE:137602	unknown
IMAGE:141854	unknown
IMAGE:1558625	unknown
IMAGE:1564426	unknown
IMAGE:1569077	unknown
IMAGE:1601926	unknown
IMAGE:1649341	unknown
IMAGE:1686600	unknown
IMAGE:1892599	unknown
IMAGE:1898442	unknown
IMAGE:1898826	unknown
IMAGE:2013496	unknown
IMAGE:210486	unknown
IMAGE:240480	unknown
IMAGE:249486	unknown
IMAGE:256619	unknown
IMAGE:262313	unknown
IMAGE:266263	unknown
IMAGE:278729	unknown
IMAGE:28927	unknown
IMAGE:289505	unknown
IMAGE:291394	unknown
IMAGE:340745	unknown
IMAGE:346643	unknown
IMAGE:358647	unknown
IMAGE:361456	unknown
IMAGE:38009	unknown
IMAGE:38072	unknown
IMAGE:42935	unknown
IMAGE:431805	unknown
IMAGE:487499	unknown
IMAGE:491415	unknown
IMAGE:503839	unknown
IMAGE:664233	unknown
IMAGE:69309	unknown
IMAGE:69378	unknown
IMAGE:741954	unknown
IMAGE:742685	unknown
IMAGE:742806	unknown
IMAGE:767289	unknown
IMAGE:782737	unknown
IMAGE:785819	unknown
IMAGE:786573	unknown
IMAGE:788217	unknown
IMAGE:795427	unknown
IMAGE:810133	unknown
IMAGE:810326	unknown
IMAGE:810486	unknown
IMAGE:810859	unknown
IMAGE:811751	unknown
IMAGE:811837	unknown
IMAGE:81417	unknown
IMAGE:824111	unknown
IMAGE:824150	unknown
IMAGE:82434	unknown
IMAGE:854122	unknown
IMAGE:855808	unknown
IMAGE:866276	unknown
IMAGE:898133	unknown
IMAGE:951007	unknown

## Sheet: Cortex and SPC
Cortex genes			SPC genes			Overlapping gene
CLID	NAME		ID	Name		ID	Name
IMAGE:1007677	unknown		IMAGE:1636365	TMEM27		IMAGE:1324438	UGT2B7
IMAGE:1049230	GGTLC2		IMAGE:757374	FRMD3		IMAGE:1472743	LGALS2
IMAGE:1057796	ANKS4B		IMAGE:682063	ZNF189		IMAGE:1553550	LOC123876
IMAGE:1073881	TRIM15		IMAGE:1033767	unknown		IMAGE:156404	LRP2
IMAGE:111510	unknown		IMAGE:824769	SLA/LP		IMAGE:1591643	UGT2B7
IMAGE:119530	KCNJ15		IMAGE:2338271	NFIA		IMAGE:1635099	SLC5A12
IMAGE:120929	unknown		IMAGE:841226	IVNS1ABP		IMAGE:1635920	SLC16A9
IMAGE:121857	SPAG5		IMAGE:308004	NPR3		IMAGE:1636606	UGT2B7
IMAGE:121997	ALDOB		IMAGE:813154	NFIA		IMAGE:246430	UGT2B4
IMAGE:122063	SLC7A7		IMAGE:813265	NFIB		IMAGE:248545	GSTA2
IMAGE:123579	SLC2A2		IMAGE:45376	ACAA2		IMAGE:277414	MAF
IMAGE:125429	SLC38A3		IMAGE:1553996	LRP2		IMAGE:295323	unknown
IMAGE:126458	MT1M		IMAGE:347687	SGCB		IMAGE:303139	FLJ14054
IMAGE:128306	CYP3A7		IMAGE:489201	PPAP2B		IMAGE:308004	NPR3
IMAGE:128426	MLXIPL		IMAGE:855658	FZD1		IMAGE:323806	unknown
IMAGE:129128	ACY3		IMAGE:788234	ID4		IMAGE:325111	HAK
IMAGE:129446	CYP4F12		IMAGE:2514707	IVNS1ABP		IMAGE:39798	SHMT1
IMAGE:1322823	HNF4G		IMAGE:450859	MAML2		IMAGE:416096	FLJ10847
IMAGE:1323328	PTHR1		IMAGE:1762111	NPR3		IMAGE:416325	unknown
IMAGE:1323345	SLC5A12		IMAGE:1740567	unknown		IMAGE:42558	GATM
IMAGE:1323539	SLC17A3		IMAGE:269300	DDAH1		IMAGE:44477	VCAM1
IMAGE:1323590	SLC13A1		IMAGE:767804	ALDH3A2		IMAGE:452708	FLJ21934
IMAGE:1324438	UGT2B7		IMAGE:81417	RNASE4		IMAGE:49164	VCAM1
IMAGE:134520	ALPK2		IMAGE:366763	LCHN		IMAGE:530197	LOC134147
IMAGE:135454	STRA6		IMAGE:303139	FLJ14054		IMAGE:624379	RHOBTB1
IMAGE:136890	unknown		IMAGE:261492	LCHN		IMAGE:742685	DAB2
IMAGE:138570	unknown		IMAGE:505864	RGL1		IMAGE:78294	unknown
IMAGE:138788	PRLR		IMAGE:1553346	HNMT		IMAGE:82710	GSTA2
IMAGE:1389018	CA4		IMAGE:812959	PWDMP
IMAGE:143846	LRP2		IMAGE:1554501	ADAMTS9
IMAGE:1456160	AZGP1		IMAGE:293819	DHRS6
IMAGE:1456900	DPEP1		IMAGE:840776	SGK
IMAGE:1457207	NGEF		IMAGE:324122	ESM1
IMAGE:1470151	GAB2		IMAGE:325111	HAK
IMAGE:1470657	DIO2		IMAGE:773293	unknown
IMAGE:1472735	MT1E		IMAGE:321900	unknown
IMAGE:1472743	LGALS2		IMAGE:257312	AD031
IMAGE:1472775	COL8A1		IMAGE:202577	HNMT
IMAGE:1492165	unknown		IMAGE:454698	FZD4
IMAGE:1492953	ACSM2B		IMAGE:280907	ZNF248
IMAGE:1501931	SLC22A11		IMAGE:487301	FBXL5
IMAGE:1502206	MGAM		IMAGE:742685	DAB2
IMAGE:1502317	unknown		IMAGE:245860	NFIB
IMAGE:1507713	CHAD		IMAGE:321434	FZD2
IMAGE:1534656	unknown		IMAGE:427812	INSR
IMAGE:1535106	HAO2		IMAGE:1604717	unknown
IMAGE:1535231	SLC28A1		IMAGE:415816	MYO9A
IMAGE:1536929	AMN		IMAGE:130541	PECAM1
IMAGE:1553245	CYP8B1		IMAGE:752668	unknown
IMAGE:1553310	AGMAT		IMAGE:868078	NFIB
IMAGE:1553394	unknown		IMAGE:234036	FBXL5
IMAGE:1553550	ACSM2B		IMAGE:2283651	TM4SF12
IMAGE:1553568	unknown		IMAGE:1517749	YPEL2
IMAGE:1553699	unknown		IMAGE:301995	unknown
IMAGE:1554355	unknown		IMAGE:342181	BCL2
IMAGE:1554659	TINAG		IMAGE:85614	LEPROTL1
IMAGE:1554793	SLC22A12		IMAGE:595181	MYLIP
IMAGE:1555209	unknown		IMAGE:502164	KIAA0303
IMAGE:1555275	CTXN3		IMAGE:785868	FLT1
IMAGE:156404	LRP2		IMAGE:377518	DKFZp762A217
IMAGE:156430	AQP7		IMAGE:191107	unknown
IMAGE:1565542	ENPEP		IMAGE:343760	SH3BGRL2
IMAGE:1573778	RASSF7		IMAGE:300276	DHRS8
IMAGE:1582949	SLC39A5		IMAGE:214858	LDB2
IMAGE:1589529	SLC28A1		IMAGE:49665	EDNRB
IMAGE:1589958	PRODH2		IMAGE:376875	FMO1
IMAGE:1590208	unknown		IMAGE:785351	ENPP2
IMAGE:1591643	unknown		IMAGE:2013515	SGK
IMAGE:1604367	LOC644242		IMAGE:768619	PLEKHA2
IMAGE:1613496	unknown		IMAGE:279985	WDFY3
IMAGE:1625969	unknown		IMAGE:704440	FLJ23861
IMAGE:1635099	SLC5A12		IMAGE:866674	unknown
IMAGE:1635305	PRAP1		IMAGE:296508	MYO9A
IMAGE:1635414	UPP2		IMAGE:823696	IFIT1
IMAGE:1635545	SLC13A1		IMAGE:416096	FLJ10847
IMAGE:1635701	ENTPD5		IMAGE:280831	DGKH
IMAGE:1635920	SLC16A9		IMAGE:745983	unknown
IMAGE:1635951	SLC22A6		IMAGE:81316	ARG99
IMAGE:1635968	SLC5A12		IMAGE:79022	FOSB
IMAGE:1636166	UNC84B		IMAGE:812256	TMOD2
IMAGE:1636606	UGT2B7		IMAGE:754106	TIMP3
IMAGE:1639187	RASSF4		IMAGE:416325	unknown
IMAGE:1648403	unknown		IMAGE:1553540	C19orf28
IMAGE:1649374	HGD		IMAGE:504791	GSTA4
IMAGE:1651433	MAF		IMAGE:752903	KIAA0303
IMAGE:1654632	PROC		IMAGE:969495	EPB41L4A
IMAGE:1671857	unknown		IMAGE:797012	SUI1
IMAGE:1684277	ZNF204		IMAGE:156404	LRP2
IMAGE:1700537	unknown		IMAGE:810090	unknown
IMAGE:1701301	SORCS1		IMAGE:1505692	RGS5
IMAGE:171979	SLC22A8		IMAGE:209758	MME
IMAGE:172751	APBA1		IMAGE:46411	FARP1
IMAGE:1761811	BBOX1		IMAGE:510729	PTPN21
IMAGE:1761925	CYP27B1		IMAGE:853809	RGS5
IMAGE:178999	FLJ33996		IMAGE:53092	SLC3A1
IMAGE:180885	HECW1		IMAGE:1324438	UGT2B7
IMAGE:1850354	CYP4F3		IMAGE:1492652	FLJ23861
IMAGE:1868222	SLC12A3		IMAGE:815245	TTC10
IMAGE:1868615	SLC7A9		IMAGE:245147	FGD5
IMAGE:1868625	AKT1S1		IMAGE:44477	VCAM1
IMAGE:1869112	TINAG		IMAGE:781468	DKFZP434F0318
IMAGE:1869152	unknown		IMAGE:868472	CLIC4
IMAGE:1869567	RP11-151A6.2		IMAGE:194342	PTD012
IMAGE:1870704	unknown		IMAGE:283430	HACE1
IMAGE:1871243	unknown		IMAGE:246430	UGT2B4
IMAGE:1877206	PRLR		IMAGE:813187	DDAH1
IMAGE:1899437	HNF4A		IMAGE:323806	unknown
IMAGE:1899878	LRP2		IMAGE:33182	unknown
IMAGE:1901097	GPD1		IMAGE:2550047	IFIT1
IMAGE:190732	SLC2A5		IMAGE:756370	EHBP1
IMAGE:191572	PIPOX		IMAGE:701710	TCF4
IMAGE:1932356	MYOM3		IMAGE:1324446	EVA1
IMAGE:194468	AGXT2		IMAGE:418049	CLCN5
IMAGE:195040	unknown		IMAGE:108422	SH3YL1
IMAGE:195905	HPD		IMAGE:143661	NTN4
IMAGE:198250	PRLR		IMAGE:838240	C1orf39
IMAGE:2019101	AGT		IMAGE:149745	unknown
IMAGE:202535	unknown		IMAGE:416959	NFIB
IMAGE:2028353	SLC23A3		IMAGE:197959	SGCB
IMAGE:2028391	SLC5A12		IMAGE:50926	SH3BGRL2
IMAGE:2028639	unknown		IMAGE:49164	VCAM1
IMAGE:2028959	DDC		IMAGE:377468	SPRY1
IMAGE:2029176	SLC6A13		IMAGE:364209	ANK3
IMAGE:2029228	CUBN		IMAGE:897557	HNRPH3
IMAGE:2029264	MIOX		IMAGE:1635600	CHC1L
IMAGE:2029476	CYP4F2		IMAGE:124597	unknown
IMAGE:2032584	unknown		IMAGE:271050	EDNRB
IMAGE:2061465	GGTLC3		IMAGE:1688510	CLK4
IMAGE:206841	unknown		IMAGE:544502	IFIT1
IMAGE:210789	AGT		IMAGE:753692	ABLIM1
IMAGE:2109825	CYP4F3		IMAGE:589853	NAP1L2
IMAGE:212021	ADH6		IMAGE:1553550	LOC123876
IMAGE:213607	ALDOB		IMAGE:767823	PALMD
IMAGE:214162	MT1H		IMAGE:488404	unknown
IMAGE:2274786	HMOX1		IMAGE:51763	MAML2
IMAGE:2285746	CUBN		IMAGE:785389	CTPS
IMAGE:2297044	FUT6		IMAGE:2350947	unknown
IMAGE:2307015	SPAG5		IMAGE:786672	RAPGEF5
IMAGE:2317017	MT1G		IMAGE:204735	unknown
IMAGE:232933	DPYS		IMAGE:812291	SGCB
IMAGE:233109	ESPN		IMAGE:666154	PDE8A
IMAGE:233349	ETNK2		IMAGE:45512	LOC283666
IMAGE:234983	AGXT		IMAGE:1926246	LRCH1
IMAGE:2401113	TFEC		IMAGE:277414	MAF
IMAGE:2407824	CALML3		IMAGE:452708	FLJ21934
IMAGE:241516	HPD		IMAGE:365098	BNIP3L
IMAGE:241821	GLYATL1		IMAGE:855389	TACC1
IMAGE:2420792	SLC7A7		IMAGE:144834	MAP7
IMAGE:243174	SERPINF2		IMAGE:1650304	RICS
IMAGE:2435471	ALDH6A1		IMAGE:594500	unknown
IMAGE:2441080	ANPEP		IMAGE:2238788	GOLGIN-67
IMAGE:245990	MT1F		IMAGE:742611	MXI1
IMAGE:246430	UGT2B4		IMAGE:296587	HLF
IMAGE:2464693	LRP2		IMAGE:271038	RGS5
IMAGE:246522	SLC17A1		IMAGE:281449	LOC51136
IMAGE:247660	NAT8		IMAGE:122915	LOC286411
IMAGE:24918	PIP5K1B		IMAGE:258101	FLT1
IMAGE:2496336	SLC27A2		IMAGE:234011	PKP2
IMAGE:2509539	FUT3		IMAGE:1650998	PTPRB
IMAGE:252663	CALB1		IMAGE:1680549	MXI1
IMAGE:2559389	C4A		IMAGE:838048	unknown
IMAGE:258761	DEPDC1B		IMAGE:2316138	D2LIC
IMAGE:25984	GDA		IMAGE:243816	CD36
IMAGE:277414	unknown		IMAGE:504575	WDFY3
IMAGE:279302	DEPDC7		IMAGE:796198	EFNB2
IMAGE:28774	PTPRD		IMAGE:504420	ARGBP2
IMAGE:288663	GJB1		IMAGE:813721	KIAA0934
IMAGE:290166	NKAIN4		IMAGE:364436	PITPNC1
IMAGE:294647	unknown		IMAGE:138672	unknown
IMAGE:296498	FTCD		IMAGE:42558	GATM
IMAGE:296702	DIO1		IMAGE:85394	PPAP2B
IMAGE:297107	PLA2G12B		IMAGE:232842	PELI1
IMAGE:297305	RBP5		IMAGE:768523	MGC14276
IMAGE:297748	CRIP3		IMAGE:1882051	AFTIPHILIN
IMAGE:298283	PTPRD		IMAGE:595637	ARID5B
IMAGE:298702	APOM		IMAGE:843036	MAP7
IMAGE:303139	C5orf23		IMAGE:788445	CYP4V2
IMAGE:308004	NPR3		IMAGE:845454	HOOK1
IMAGE:309499	C7orf10		IMAGE:563701	MRPL19
IMAGE:321658	PRLR		IMAGE:2336208	ING3
IMAGE:323806	CHD9		IMAGE:755881	AQP5
IMAGE:325111	ALPK2		IMAGE:840663	HSPC159
IMAGE:376080	XPNPEP2		IMAGE:812294	unknown
IMAGE:377348	CALML3		IMAGE:1588859	PHTF1
IMAGE:378265	TMEM132E		IMAGE:264537	C9orf55
IMAGE:384015	DDC		IMAGE:290378	PODXL
IMAGE:38511	SLC13A3		IMAGE:1537001	MGAT4A
IMAGE:38517	OTOF		IMAGE:1525823	SIAT8D
IMAGE:39178	PBLD		IMAGE:40562	SGCB
IMAGE:396229	PLCH2		IMAGE:51920	OSBPL1A
IMAGE:396822	LOC554235		IMAGE:277073	MAP7
IMAGE:39798	SHMT1		IMAGE:267202	ZNF462
IMAGE:415670	SLC7A8		IMAGE:302188	NEBL
IMAGE:416096	SLC47A1		IMAGE:501994	IL1RL1
IMAGE:416325	ACSM2B		IMAGE:1055460	PANK1
IMAGE:416978	SLC39A5		IMAGE:124405	AIG1
IMAGE:417592	ABCC2		IMAGE:142259	OPTN
IMAGE:42558	GATM		IMAGE:795757	unknown
IMAGE:42824	GDA		IMAGE:364921	CTNND1
IMAGE:430314	HPD		IMAGE:412881	LOC55871
IMAGE:430471	PROZ		IMAGE:1587715	unknown
IMAGE:433253	FBP1		IMAGE:1638475	PER2
IMAGE:43745	SYT6		IMAGE:774181	TIMP3
IMAGE:44477	VCAM1		IMAGE:1572838	KCNIP4
IMAGE:448093	CYP3A5		IMAGE:78294	unknown
IMAGE:452708	UGT2A3		IMAGE:435824	INM01
IMAGE:453988	ABCC6		IMAGE:1908402	TAZ
IMAGE:454635	PCK2		IMAGE:1474023	JAG1
IMAGE:45500	TMEM16C		IMAGE:687270	MEF2C
IMAGE:461727	PAH		IMAGE:29258	unknown
IMAGE:461759	OLR1		IMAGE:758318	FBXO3
IMAGE:47204	CPNE6		IMAGE:416676	PELI1
IMAGE:48404	GDA		IMAGE:291965	WASPIP
IMAGE:484641	SLCO2A1		IMAGE:503741	LIFR
IMAGE:486697	2009-03-09		IMAGE:430968	ENPP3
IMAGE:488246	TMEM200A		IMAGE:898228	unknown
IMAGE:489839	ENPEP		IMAGE:461761	RNASE4
IMAGE:49164	VCAM1		IMAGE:471372	SLC35A3
IMAGE:504927	PDZK1IP1		IMAGE:281706	BTBD7
IMAGE:506128	PRLR		IMAGE:609366	MXI1
IMAGE:511234	PDZD3		IMAGE:298155	ACADM
IMAGE:51221	CSDC2		IMAGE:489102	EPIM
IMAGE:51406	SLC13A3		IMAGE:810515	PTPRE
IMAGE:51746	RGS7		IMAGE:309469	SSH2
IMAGE:52071	FLJ23834		IMAGE:813157	DKFZp547A023
IMAGE:530197	CMBL		IMAGE:757961	STX3A
IMAGE:624379	RHOBTB1		IMAGE:753301	CEACAM1
IMAGE:626967	ALPI		IMAGE:869504	unknown
IMAGE:647397	MAPT		IMAGE:785695	NDFIP2
IMAGE:666159	NPL		IMAGE:210599	unknown
IMAGE:67042	APOM		IMAGE:824150	PSMB7
IMAGE:67069	ACMSD		IMAGE:841620	DPYSL2
IMAGE:68061	ALDH1L1		IMAGE:366209	unknown
IMAGE:68557	FABP1		IMAGE:447786	AUTS2
IMAGE:69467	SLC13A3		IMAGE:823901	UVRAG
IMAGE:712030	CLCN4		IMAGE:609525	ETV6
IMAGE:741988	ACY1		IMAGE:450938	DKFZP586A0522
IMAGE:742082	PCK1		IMAGE:284076	CREBL2
IMAGE:742685	DAB2		IMAGE:853358	unknown
IMAGE:74512	ASS1		IMAGE:796078	MAPKAP1
IMAGE:77636	BHMT		IMAGE:565379	GRB10
IMAGE:77897	KHK		IMAGE:280122	KIAA1345
IMAGE:78294	UGT2B15		IMAGE:66977	AIG1
IMAGE:78353	MT1F		IMAGE:789369	ID4
IMAGE:787938	SLC4A4		IMAGE:884903	VPS13A
IMAGE:795307	RBP5		IMAGE:162308	CYYR1
IMAGE:812074	BBOX1		IMAGE:83358	unknown
IMAGE:812098	NOX4		IMAGE:1591643	UGT2B7
IMAGE:812187	COLEC11		IMAGE:77325	DHX30
IMAGE:813402	REN		IMAGE:502978	MOBKL2B
IMAGE:825742	SLC1A1		IMAGE:291083	MOBKL2B
IMAGE:82710	GSTA2		IMAGE:24033	unknown
IMAGE:855523	GPX3		IMAGE:345645	PDGFB
IMAGE:85979	PLG		IMAGE:66978	unknown
IMAGE:882461	ASS1		IMAGE:1492276	RNASE4
IMAGE:882522	ASS1		IMAGE:310105	IFIT5
IMAGE:897422	SLIT2		IMAGE:1638993	NRF1
IMAGE:897529	ACSF2		IMAGE:298134	FZD1
IMAGE:901013	BAIAP2L2		IMAGE:384088	KIAA0711
IMAGE:901105	BAIAP2L2		IMAGE:897963	KIAA0052
			IMAGE:32110	ABCG2
			IMAGE:897271	KL
			IMAGE:701629	TCF4
			IMAGE:342720	SNRK
			IMAGE:841220	unknown
			IMAGE:435160	PSMA7
			IMAGE:843374	STOM
			IMAGE:82290	C9orf42
			IMAGE:2516036	ABLIM1
			IMAGE:141815	JAG1
			IMAGE:284022	unknown
			IMAGE:1915749	GMFG
			IMAGE:196189	CYB5
			IMAGE:23794	RAB11FIP3
			IMAGE:1925760	PTEN
			IMAGE:123755	ERG
			IMAGE:137457	NFATC3
			IMAGE:627509	CDKN1B
			IMAGE:2010684	unknown
			IMAGE:269663	unknown
			IMAGE:812161	PARD6G
			IMAGE:741790	AFTIPHILIN
			IMAGE:2569701	RGS5
			IMAGE:878182	A2M
			IMAGE:501540	ARID5B
			IMAGE:135640	STX3A
			IMAGE:1114524	LOC146517
			IMAGE:209756	SAP18
			IMAGE:46355	LOC57146
			IMAGE:289016	MAGI1
			IMAGE:1688537	FBXO31
			IMAGE:450998	unknown
			IMAGE:1758233	RGS4
			IMAGE:194399	GAB1
			IMAGE:46265	unknown
			IMAGE:1585904	FLJ11200
			IMAGE:489519	TIMP3
			IMAGE:1629535	DZIP3
			IMAGE:140064	LRCH1
			IMAGE:248545	GSTA2
			IMAGE:131979	EPAS1
			IMAGE:489947	MXI1
			IMAGE:796199	AHI1
			IMAGE:52021	DACH1
			IMAGE:62093	unknown
			IMAGE:530197	LOC134147
			IMAGE:289677	PFAAP5
			IMAGE:785986	unknown
			IMAGE:271478	MXI1
			IMAGE:1636606	UGT2B7
			IMAGE:435219	MXI1
			IMAGE:431208	MAML2
			IMAGE:1523140	NLGN1
			IMAGE:290555	CLK4
			IMAGE:199558	DHRS6
			IMAGE:782193	LATS2
			IMAGE:488945	unknown
			IMAGE:366966	PTEN
			IMAGE:812143	FLRT3
			IMAGE:1493181	HSPC129
			IMAGE:785535	PIAS1
			IMAGE:246543	unknown
			IMAGE:811890	SLK
			IMAGE:151240	unknown
			IMAGE:564898	NLGN1
			IMAGE:1031747	ALKBH
			IMAGE:841695	CG018
			IMAGE:741954	SLC25A23
			IMAGE:767721	FLJ32810
			IMAGE:1638455	unknown
			IMAGE:70152	DKFZP586A0522
			IMAGE:530185	CD83
			IMAGE:292068	SRP46
			IMAGE:713347	DKFZp434H2111
			IMAGE:139861	CREBL2
			IMAGE:1926217	PLEKHA1
			IMAGE:46070	unknown
			IMAGE:786544	HNRPDL
			IMAGE:814417	MLL5
			IMAGE:61502	PVRL3
			IMAGE:138104	PRRG4
			IMAGE:723955	EFNB2
			IMAGE:782812	IFNAR1
			IMAGE:346902	ZNF11B
			IMAGE:200599	unknown
			IMAGE:1759218	HBXIP
			IMAGE:1456717	PKP4
			IMAGE:1669563	RFP2
			IMAGE:322695	unknown
			IMAGE:448417	TNFRSF19
			IMAGE:731125	unknown
			IMAGE:768940	ANKRD12
			IMAGE:839094	CRYBA1
			IMAGE:858998	NDFIP2
			IMAGE:841610	EIF4EBP2
			IMAGE:280769	GSTA4
			IMAGE:841263	NUMB
			IMAGE:2549991	NME2
			IMAGE:77911	FLJ20366
			IMAGE:840970	KLEIP
			IMAGE:645956	C9orf87
			IMAGE:812137	FLJ20331
			IMAGE:253141	unknown
			IMAGE:504421	ADFP
			IMAGE:786612	unknown
			IMAGE:1620748	SLC30A7
			IMAGE:815303	DARS
			IMAGE:197404	unknown
			IMAGE:1500370	C10orf118
			IMAGE:812283	DIXDC1
			IMAGE:283982	unknown
			IMAGE:234425	LOC253981
			IMAGE:283995	UBE3A
			IMAGE:823902	TNFRSF21
			IMAGE:249517	unknown
			IMAGE:322461	ENPP5
			IMAGE:511633	DDX58
			IMAGE:814899	BNIP3L
			IMAGE:2312236	FAM8A1
			IMAGE:2578799	RPS2
			IMAGE:39798	SHMT1
			IMAGE:823943	unknown
			IMAGE:143332	NPY1R
			IMAGE:1555201	FCHO2
			IMAGE:242823	LOC146517
			IMAGE:1914520	unknown
			IMAGE:162211	ABCD3
			IMAGE:277621	FLJ23518
			IMAGE:221694	unknown
			IMAGE:395539	unknown
			IMAGE:278483	TYMS
			IMAGE:666371	THBS1
			IMAGE:1325813	unknown
			IMAGE:1569150	PFTK1
			IMAGE:82710	GSTA2
			IMAGE:843109	FARS1
			IMAGE:136984	unknown
			IMAGE:1500416	ATP11A
			IMAGE:1636851	unknown
			IMAGE:269269	TGFBR3
			IMAGE:713078	DGKQ
			IMAGE:826622	LKAP
			IMAGE:295323	unknown
			IMAGE:786530	C14orf154
			IMAGE:322443	SLC16A9
			IMAGE:193182	TACC1
			IMAGE:1635099	SLC5A12
			IMAGE:504300	FLT1
			IMAGE:428338	INADL
			IMAGE:1635920	SLC16A9
			IMAGE:32989	DKFZP564A022
			IMAGE:745437	MGC33302
			IMAGE:83649	unknown
			IMAGE:1472743	LGALS2
			IMAGE:148960	DKFZp761C169
			IMAGE:1690055	EPHA5
			IMAGE:594120	PDK4
			IMAGE:2556526	DSCR1
			IMAGE:742743	LOC253981
			IMAGE:139883	KIAA1754
			IMAGE:241874	FLJ12592
			IMAGE:40038	unknown
			IMAGE:841334	STIP1
			IMAGE:840442	DC36
			IMAGE:1160531	ERBB3
			IMAGE:417884	CYP4V2
			IMAGE:243291	unknown
			IMAGE:36387	ALDH9A1
			IMAGE:320857	KCNJ2
			IMAGE:812068	CYP4V2
			IMAGE:813266	FHL1
			IMAGE:282996	KIAA0240
			IMAGE:795552	HIBCH
			IMAGE:841332	ARHGDIB
			IMAGE:322128	RAB21
			IMAGE:810008	DZIP3
			IMAGE:322615	DKFZP564D172
			IMAGE:624379	RHOBTB1
			IMAGE:120106	CASP1
			IMAGE:31093	CDH13
			IMAGE:46715	unknown
			IMAGE:1902820	VPS13A
			IMAGE:712314	MYLIP
			IMAGE:788745	DCTN6
			IMAGE:79848	NEDD9
			IMAGE:853998	EVA1
			IMAGE:38569	CPNE8
			IMAGE:454701	CHD9
			IMAGE:183337	HLA-DMA
			IMAGE:1636072	JTB
			IMAGE:682045	STARD13
			IMAGE:324307	TM4SF10
			IMAGE:243741	UBD
			IMAGE:143426	RHOB
			IMAGE:256284	NRAS
			IMAGE:247240	C19orf13
			IMAGE:868652	C4A
			IMAGE:268700	unknown
			IMAGE:1582738	EAF2
			IMAGE:813631	TM7SF3
			IMAGE:198033	unknown
			IMAGE:196038	LOC129285
			IMAGE:773605	2009-09-11
			IMAGE:626326	SNRPN
			IMAGE:83180	IRF2BP2
			IMAGE:488033	DNAJB9
			IMAGE:229856	CEPT1
			IMAGE:785693	LOC128153
			IMAGE:2296063	KIAA0528
			IMAGE:80318	SP1
			IMAGE:342712	KIAA0494
			IMAGE:564549	BLMH
			IMAGE:210610	CEP1
			IMAGE:40537	ZNF510
			IMAGE:207808	NFATC3
			IMAGE:1632056	ZNF552
			IMAGE:141845	CRIM1
			IMAGE:39586	C19orf13
			IMAGE:295824	FLJ11848
			IMAGE:132165	C10orf32
			IMAGE:813678	SLC1A3
			IMAGE:759159	RGS5
			IMAGE:869187	EPAS1
			IMAGE:503033	BTBD7
			IMAGE:328810	PPM1E
			IMAGE:141562	SLC16A4
			IMAGE:1940425	FLJ32810
			IMAGE:1521459	LOC126661
			IMAGE:47900	IFNGR1
			IMAGE:453602	CALD1
			IMAGE:727551	IRF2
			IMAGE:1592953	JAK1
			IMAGE:2139152	RAPGEF2
			1240243	C1orf25
			IMAGE:785530	PELO
			IMAGE:1571882	unknown
			IMAGE:136954	FLJ90013
			IMAGE:292939	ZBTB4
			IMAGE:328768	HS2ST1
			IMAGE:744944	MYO6
