# Supplementary material for: Alteration of Gene Expression Signatures of Cortical Differentiation and Wound Response in Lethal Clear Cell Renal Cell Carcinomas
Source: PLoS One. 2009 Jun 25;4(6):e6039. doi: 10.1371/journal.pone.0006039 (PMC2698218; doi:10.1371/journal.pone.0006039)
Supplement: File S5 — Expression levels of EMT markers in 177 ccRCC patients (0.03 MB XLS) [file pone.0006039.s005.xls]

## Sheet: EMT
CLID	NAME	GWEIGHT	shdj188 0301	shdj189 0026	shdj190 0013	shdj191 0011	shdj192 9932	shdj193 9931	shdj194 0108	shdj195 0310	shdj196 0239	shdj197 0229	shdj198 0217	shdj200 0111	shdu140 9921	shdu141 9922	shdu142 0235	shdu164 0245	shdu165 0238	shdu166 0104	shdu188 0208	shdu191 9923	shdu192 0006	shdu213 0019	shdu215 0025	shdu216 0312	shdu217 0306	SHEB130 9812	SHEB131 9827	SHEB132 9907	SHEB154 9934	SHEB155 0001	SHEB156 0018	SHEB157 0101	SHEB158 0112	sheo098 9871	sheo124 8807	sheo125 9818	sheo169 9608	sheo170 8817	sheo171 0204	sheo172 9930	sheo173 9919	sheo207 9712	sheo209 9711	sheo225 9401	sheo226 0209	sheo227 0103	sheo228 9935
IMAGE:416386	CDH1 || Cadherin 1, type 1, E-cadherin (epithelial) || Hs.194657 || 105778	1	-1.7	-0.72	-1.83	1.53	-0.77	-0.28	-0.8	-0.42	-2.77	-0.33	-1.62	-1.12	-0.48	-0.21	0.53	2.32	-2.37	1.58	3.02	-1.31	-0.45	-3.08	-2.25	-2.98	0.23	-3.31		-0.11	-1.75	0.7	1	0.2	0.79	-1.63		-1.42	-0.51	-2.15	-0.7	-3.05	-5.17	-1.84	-1.06	-1.28	-0.65	-2.42	-5.31
IMAGE:251019	CDH1 || Cadherin 1, type 1, E-cadherin (epithelial) || Hs.194657 || 112496	1	-1.49	-0.63	-1.3	1.11	-0.24	-0.38	-0.5	-0.73	-1.71	-0.34	-0.94	-0.99	-0.65	-0.58	-0.12	1.77	-1.31	0.91	2.8	-1.18	-0.01	-2.04	-1.53	-2.22	0.25					0.11	0.36	-0.32	0.27	-1.39	-1.3	-0.58	-0.06	-1.1	-0.05	-2.36	-2.46	-0.86	-0.8	-1.07	-0.65	-2.39	-3.27
IMAGE:79598	CDH1 || Cadherin 1, type 1, E-cadherin (epithelial) || Hs.194657 || 308865	1	-1.67	-0.77	-2.06	1.55	-0.82	-0.44	-0.9	-0.17	-2.52	-0.43	-1.71	-1.03	-0.23	0.12	0.67	2.08	-3.05	1.6	2.92	-1.38	-0.44	-2.99	-2.31		0.23	-3.79	-1.27	0.42	-2.27	1.25	1.09	0.06	0.71	-1.52		-1.23	-0.12	-2.11	-0.35	-2.7	-2.04	-1.76	-0.93	-1.22	-0.65	-2.81	-5.35
IMAGE:325182	CDH2 || Cadherin 2, type 1, N-cadherin (neuronal) || Hs.334131 || 109288	1	-0.37	-0.08	-0.68	0.55	0.03	-0.97	0.09	0.74	-0.24	-0.14	0.8	-0.21	-0.84	-0.88	-0.76		0.71			-0.12	0.05	1.8	0.18	-1.39	1.1	-1.21	-0.97	-0.64	-1.75	1.27	-0.21	0.08	-0.03	-0.87	-1.33	1.45	1.06	0.25	1.04	1.37	1.37	0.33	-0.72	0.37	0.57	-0.33	-1.78
IMAGE:840511	VIM || Vimentin || Hs.435800 || 112154	1	2.95	1.32	1.69	1.23	1.03	1.9	0.47	2.55	1.9	1.99	2.17	1.14	0.78	1.24	-0.98	-1.73	1.42	-1.74	-2.07	1.41	1.55	2.88	1.77	2.28	1.68	2.13	1.63	1.15	1.63	0.86	1.16	1.17	1.69	1.02	1.38	0.56	0.64	1.68	1.35	2.03	1.35	1.25	0.55	1.49	1.74	1.65	1.74
IMAGE:590323	VIM || Vimentin || Hs.435800 || 114407	1	2.43	0.52	0.94	0.4	-0.05	1	-0.26	2.23	1.9	1.36	2.01	0.65	0.67	0.9	-1.48	-2.35	1.28	-2.9	-2.79	0.89	0.86	3	1.24	2.06	1.42	2.21	1.73	1.22	1.3	1.07	1.18	1.3	1.67	0.72	0.91	0.35	-0.35	0.58	0.36	1.59	0.83	0.2	0.42	1.21	1.6	1.12	1.88
IMAGE:139009	FN1 || Fibronectin 1 || Hs.418138 || 104992	1	-0.78	-1.9	-0.22	-1.15	-1.29	-1.83	-2.16	-2.71	1.77	-0.97	2.45	-0.6	-1.9	-2.29	2.01	-4.77	-1.72	-4.99	-4.55	-2.09	-2.72	-1.72	-1.98	-2.2	-2.75	1	-2.39	-0.78	0.07	-2.62	-2.72	-1.35	-1.18	-0.77	-1.38	-0.55	-1.19	-1.75	-1.15	-1.43	-1.63	-0.98	1.95	0.95	-1.93	-2.51	-0.75
IMAGE:1870935	FN1 || Fibronectin 1 || Hs.418138 || 109983	1	-0.81	-1.74	0.17	-1.08	-1.39		-2.12	-2.94	1.94	-1.02	2.41	-0.61	-2.06	-2.27	2.12	-4.63	-1.7	-4.91	-4.53	-2.06	-2.7	-1.66	-1.97	-1.86	-2.9	0.92	-1.97	-0.5	0.29	-2.24	-2.49	-1.26	-0.77	-0.61	-0.79	-0.72	-0.68	-0.86	-0.92	-0.36	-0.4	-0.52	1.81	0.67	-2.07	-3.15	-1.2
IMAGE:233277	FN1 || Fibronectin 1 || Hs.418138 || 115461	1	-3.95	-0.88		-0.25	-0.4	-1.03	-0.67		1.9	-1.81	0.89	0.41		-2.31	2.88					-1.07	-1.25	-0.87	-1.2		-1.56	1.18		1.7		-2.53					0.01			-4.37					2.61	-0.36	-0.76	-1.18	0.28
IMAGE:296556	FN1 || Fibronectin 1 || Hs.418138 || 119985	1	-0.52	-0.1	0.05	0.12	-0.14	0.12	0.16	-0.75	-0.38	-0.21	-0.27	-0.27	0.35	0.27	0.1	-1.04	-0.54	0.27	0.6	-0.43	0.1	-0.11	-0.11	-0.74	-0.38	0.66	-0.35	0.7	-0.42	1.07	0.57	0.45	0.09	0.15	-0.04	-0.64	-2.52	-0.24	-1.1	-1.03	-1.17	-0.61	-0.45	-0.14	-0.6	-0.33	-0.14
IMAGE:1554962	FN1 || Fibronectin 1 || Hs.418138 || 314338	1	-0.79	-2.01	-0.14	-1.32	-1.29	-2.05	-2	-4.11	2.4	-1.28	2.29	-0.69	-2.09	-2.41	2.11	-5.61	-1.95	-5.71	-4.75	-2.24	-2.67	-1.89	-1.8	-2.9	-2.75	0.73	-3.32	-1.27	-1.07	-4.31	-3.27	-1.66	-2.02										1.96	0.43	-1.82	-2.55	-1.04
IMAGE:415682	FN1 || Fibronectin 1 || Hs.418138 || 99232	1	-1.16	-0.99	-0.79	-1.52	-0.91	-0.84	-1.44	-2.42	2.03	-1.09	0.63	-0.3	-0.26	-1.27	0.26			-5.69		-0.98	-1.27	-1.29	-1.21	-1.71	-1.34	0.95	-0.3	1.15	-0.61	-2.79	-1.57	0.01	-0.55				-3.33			-3.09	-2.9		0.96	-0.43	-1.15	-1.26	-0.38
[truncated: 130 more columns]
